# Supplementary material for: A low-coordinate iron organoazide complex
Source: Royal Society of Chemistry journal article supplement (doi:10.1039/d3cc03765g), 2023-01-01
Supplement: d3cc03765g1.pdf [file d3cc03765g1.pdf]

## **A Low-Coordinate Iron Organoazide Complex**

Andres Gonzalez,<sup>a</sup> Serhiy Demeshko,<sup>b</sup> Franc Meyer,<sup>b</sup> C. Gunnar Werncke<sup>a,\*</sup>

<sup>a</sup>Philipps-University Marburg, Hans-Meerwein-Straße 4, D-35032 Marburg, Germany.

<sup>b</sup>Institute of Inorganic Chemistry, University of Göttingen, Tammannstr. 4, D-37077 Göttingen, Germany

|                                                           |    |
|-----------------------------------------------------------|----|
| Content                                                   |    |
| General considerations .....                              | 1  |
| Spectra of Compounds 1-3 .....                            | 3  |
| X-Ray diffraction analysis and molecular structures ..... | 13 |
| Quantum chemical calculations.....                        | 19 |
| References .....                                          | 29 |

## General considerations

All manipulations were carried out under inert atmosphere. Compounds that required constant and precise handling were stored in a SYSTEMTECHNIK GS glovebox-system GS043818 under inert atmosphere. Solvents were dried by continuous distillation over sodium metal for several days, degassed *via* three freeze-pump cycles, and stored over 4 Å molecular sieves. Spectral analysis for  $^1\text{H}$  NMR were conducted using automatic *BRUKER AV II 300 MHz* Spectrometers. The residual signals for deuterated solvents were used to calibrate the measured spectra. All measurements were carried out between 290 and 300 K. The internal standard values for  $^1\text{H}$  NMR correspond to tetramethylsilane (TMS, 0.00 ppm) and the observed shifts are relative to the standard. The fit of the NMR titration curve was performed using *bindfit*.<sup>[1,2]</sup> Elemental analysis measurements were performed by the spectrometry team of the Philipps-University Marburg, Germany, using an *ELEMENTAR vario Micro cube* in CHN mode. Infrared spectra were recorded with a *BRUKER ALPHA FT-IR*. Classification of the signals is as follows: *w*: weak, *m*: medium, *s*: strong. The UV/Vis spectra were measured in *n*-pentane using an *ANALYTIK-JENA SPECORD S 600* spectrometer in the range from 1000 nm up to 250 nm. Solution magnetic susceptibilities were determined by the EVANS method.<sup>[3,4]</sup>  $[\text{Fe}(\text{N}(\text{SiMe}_3)_2)_2]$ <sup>[5]</sup> and *tert*-butylazide<sup>[6]</sup> were synthesized following literature procedures.  $\text{KC}_8$  was obtained by heating potassium metal with stoichiometric amounts of graphite using a heat gun.

## EXPERIMENTAL SECTION

**[Fe(N<sub>3</sub><sup>t</sup>Bu)(N(SiMe<sub>3</sub>)<sub>2</sub>)<sub>2</sub>] (1).** [Fe(N(SiMe<sub>3</sub>)<sub>2</sub>)<sub>2</sub>] (100 mg, 0.265 mmol, 1 equiv.) was dissolved in *n*-pentane (1 mL) to give a light green solution. The solution was cooled down to -30 °C and added to N<sub>3</sub><sup>t</sup>Bu (26.27 mg, 0.265 mmol, 1 equiv.) resulting in a light-yellow coloration. After 5 minutes at room temperature, the yellowish-green solution was stored at -30 °C overnight. [Fe(N<sub>3</sub><sup>t</sup>Bu)(N(SiMe<sub>3</sub>)<sub>2</sub>)<sub>2</sub>], **1**, was obtained as colourless crystalline blocks. Yield: 82 mg (0.172 mmol, 65 %). <sup>1</sup>H-NMR (293 K, 500 MHz, toluene-d<sub>8</sub>, ppm) δ: 35.27 (*bs*, 36 H, -Si(CH<sub>3</sub>)<sub>3</sub>), -10.40 (*bs*, 9H, -NC(CH<sub>3</sub>)<sub>3</sub>). IR (ATR, cm<sup>-1</sup>):  $\tilde{\nu}$  = 2946 (m), 2894 (vw), 2117 (s, azide stretching band), 1465 (vw), 1433 (vw), 1401 (vw), 1374 (w), 1283 (s), 1240 (m), 1197 (m), 960 (vs), 888 (m), 813 (vs), 786 (vs), 749 (s), 706 (m), 665 (s), 633 (m), 611 (m), 586 (m), 555 (w). Elemental analysis gave consistent substantial deviations (approx. 1% too low for carbon C, approx. 5% too low for N) despite repeated attempts. These values approach that of Fe(N(SiMe<sub>3</sub>)<sub>2</sub>)<sub>2</sub>, yet **1** was substantiated by proton NMR, IR and Mössbauer spectroscopy, and X-Ray diffraction on large crystalline blocks, that were also used for elemental analysis.

**[Fe(κ<sup>2</sup>-N-N(SiMe<sub>3</sub>)SiMe<sub>2</sub>CH<sub>2</sub>-NH<sup>t</sup>Bu)(N(SiMe<sub>3</sub>)<sub>2</sub>)] (2).** [Fe(N(SiMe<sub>3</sub>)<sub>2</sub>)<sub>2</sub>] (100 mg, 0.265 mmol, 1 equiv.) was dissolved in *n*-heptane to give a light green solution. The solution was cooled down to -30 °C and added to N<sub>3</sub><sup>t</sup>Bu (26.27 mg, 0.265 mmol, 1 equiv.) resulting in a light-yellow coloration. The mixture was heated to 60 °C for 20 minutes, which resulted in a colour change to dark brown. The solution was concentrated and stored at -30 °C for several days. [Fe(κ<sup>2</sup>-N-N(SiMe<sub>3</sub>)SiMe<sub>2</sub>CH<sub>2</sub>-NH<sup>t</sup>Bu)(N(SiMe<sub>3</sub>)<sub>2</sub>)], **2**, was obtained as pale yellow crystalline plates. Yield: 40 mg (0.09 mmol, 34 %). <sup>1</sup>H-NMR (300 K, 300 MHz, C<sub>6</sub>D<sub>6</sub>, ppm) δ: 72.45 (*bs*, 3 H), 69.81 (*bs*, 3 H), -1.29 (*bs*, 18 H), -7.32 (*bs*, 9 H), -11.53 (*bs*, 9 H). Magnetic susceptibility (500 MHz, 300 K, C<sub>6</sub>D<sub>6</sub> + 1% TMS): μ<sub>eff</sub> = 4.75 μ<sub>B</sub>, μ<sub>s.o.</sub> (*S* = 2) = 4.89 μ<sub>B</sub>. IR (ATR, cm<sup>-1</sup>):  $\tilde{\nu}$  = 2947 (m), 2894 (w), 1477 (vw), 1431 (vw), 1412 (vw), 1392 (vw), 1370 (w), 1242 (s), 1202 (w), 1173 (w), 1037 (vw), 1008 (vs), 885 (m), 875 (m), 814 (vs), 794 (vs), 780 (vs), 749 (s), 696 (m), 667 (s), 633 (m), 626 (m), 610 (m), 503 (w). Elemental analysis: Calcd. (%) for C<sub>16</sub>H<sub>45</sub>FeN<sub>3</sub>Si<sub>4</sub> (475.76 g mol<sup>-1</sup>): C: 42.92, H: 10.13, N: 9.39; found: C: 42.52, H: 9.79, N: 9.44.

**[{(Me<sub>3</sub>Si)<sub>2</sub>N}Fe{μ-N<sup>t</sup>Bu-μ-(N(SiMe<sub>3</sub>)<sub>2</sub>)Fe(N(SiMe<sub>3</sub>)<sub>2</sub>)}] (3).** [Fe(N(SiMe<sub>3</sub>)<sub>2</sub>)<sub>2</sub>] (100 mg, 0.265 mmol, 1 equiv.) was dissolved in *n*-pentane (1 mL) to give a light green solution. The solution was cooled down to -30 °C and added to N<sub>3</sub><sup>t</sup>Bu (26.3 mg, 0.265 mmol, 1 equiv.) resulting in a light-yellow coloration. KC<sub>8</sub> (42.3 mg, 0.318 mmol, 1.2 equiv.) was added to result in gas evolution and change of colour to dark orange. After 10 minutes at room temperature, the solution was filtered and stored at -30 °C overnight. [{(Me<sub>3</sub>Si)<sub>2</sub>N}Fe{μ-N<sup>t</sup>Bu-μ-(N(SiMe<sub>3</sub>)<sub>2</sub>)Fe(N(SiMe<sub>3</sub>)<sub>2</sub>)}], **3**, was obtained as dark orange blocks. Yield: 33 mg (0.047 mmol, 53 %, based on the formation of one equivalent of K(Fe(NR<sub>2</sub>)<sub>3</sub>) as the by-product). <sup>1</sup>H-NMR (300 K, 300 MHz, toluene-d<sub>8</sub>, ppm) δ: -2.41 (*bs*), -6.71 (*bs*). IR (ATR, cm<sup>-1</sup>):  $\tilde{\nu}$  = 2945 (m), 2890 (w), 1241 (s), 1213 (m), 982 (vs), 888 (s), 833 (vs), 782 (s), 749 (s), 711 (m), 659 (s), 609 (m), 611 (m).

Elemental analysis provided consistently deviating values for carbon and nitrogen, which we attribute to incomplete combustion and silicon carbide formation, as also the side-product K(Fe(NR<sub>2</sub>)<sub>3</sub>) exhibits similar values as **3**.

## Spectra of Compounds 1-3

### Compound $[\text{Fe}\{\text{N}_3^t\text{Bu}\}(\text{N}(\text{SiMe}_3)_2)_2]$ , **1**

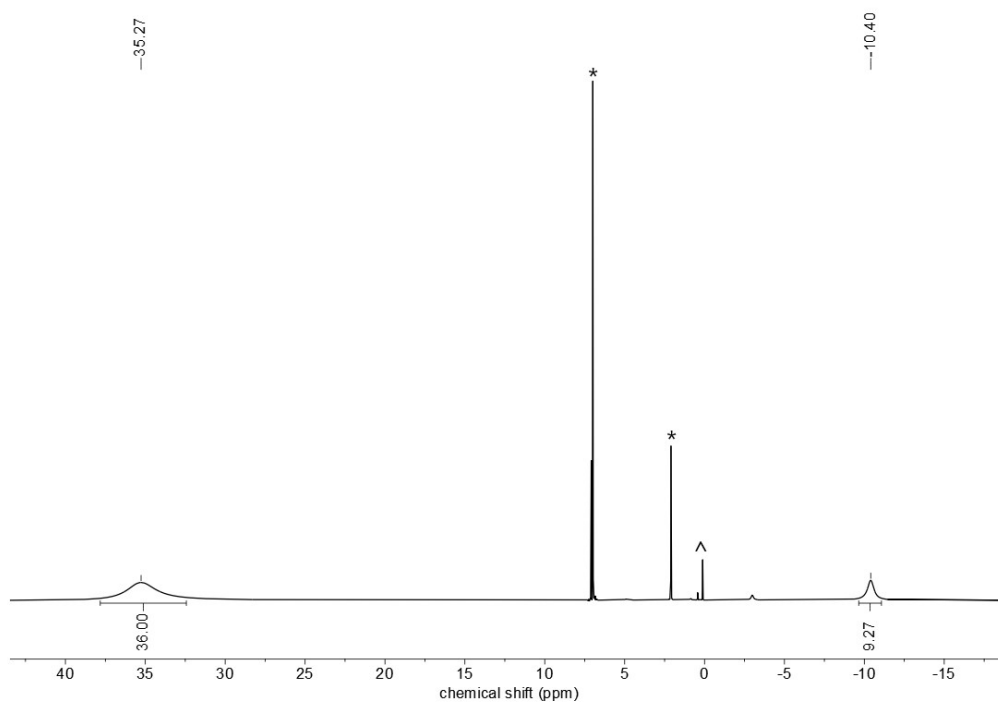

**Figure S 1.**  $^1\text{H}$  NMR spectrum (500 MHz, 293 K,  $\text{toluene-d}_8$ ) of  $[\text{Fe}\{\text{N}_3^t\text{Bu}\}(\text{N}(\text{SiMe}_3)_2)_2]$ , **1** (\*  $\text{toluene-d}_8$ , ^ decomposition).

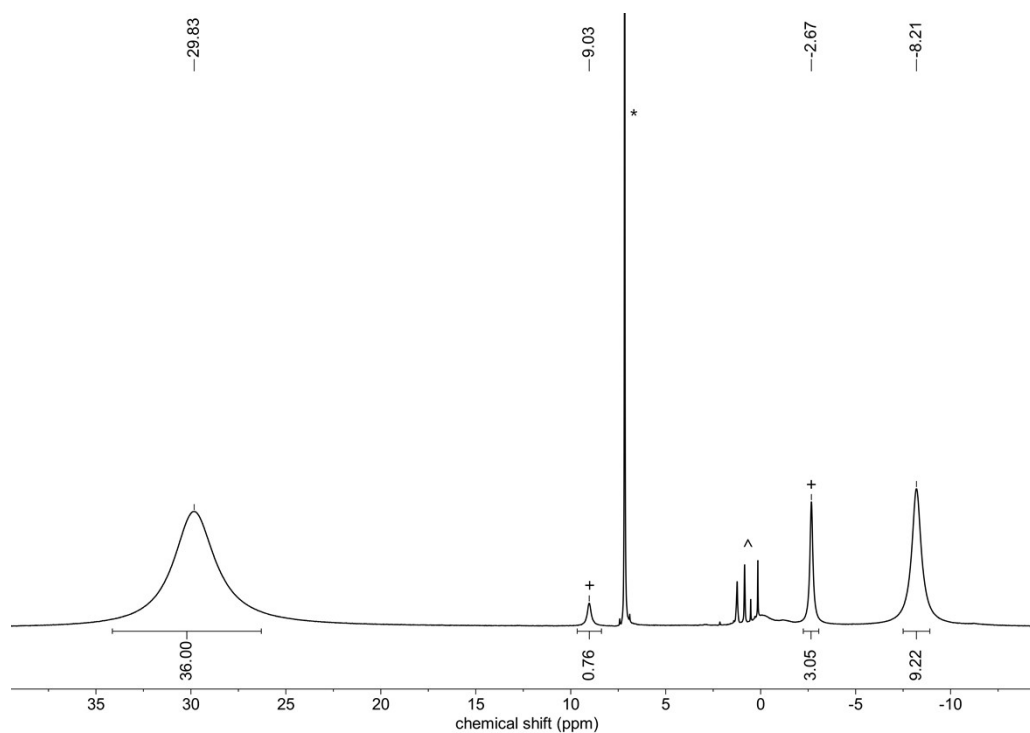

**Figure S 2.**  $^1\text{H}$  NMR spectrum (300 MHz, 300 K,  $\text{C}_6\text{D}_6$ ) of the reaction between  $[\text{Fe}(\text{N}(\text{SiMe}_3)_2)_2]$  and  $^t\text{BuN}_3$  after 20 min in neat conditions (\*  $\text{C}_6\text{D}_6$ , + presumed imido species **[A]**, ^ decomposition).

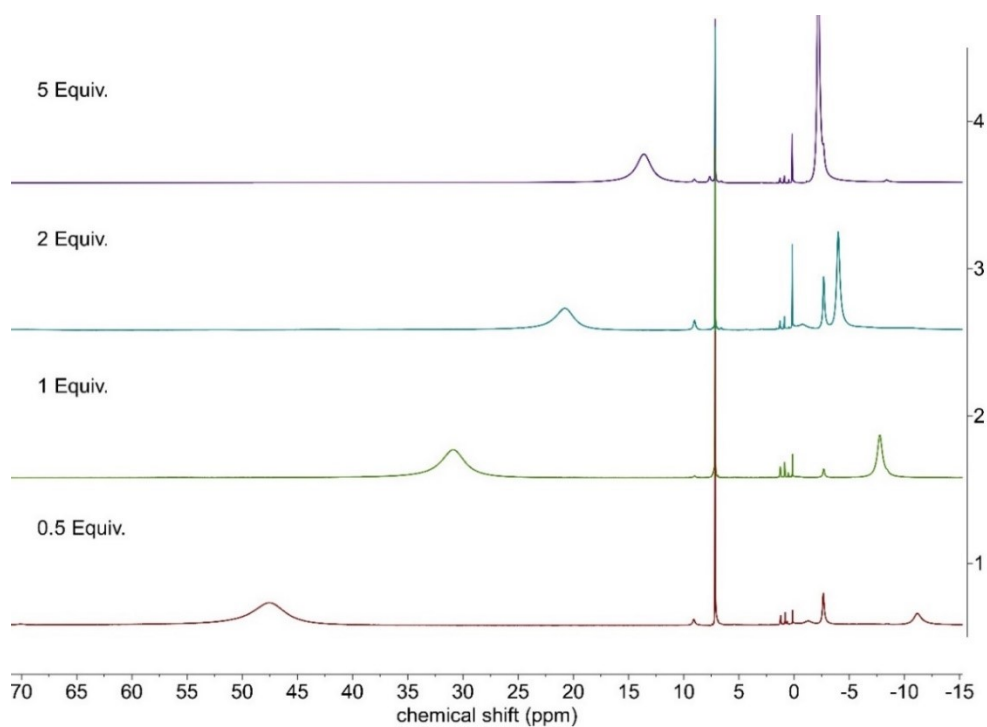

**Figure S 3.**  $^1\text{H}$  NMR (300 MHz, 300 K,  $\text{C}_6\text{D}_6$ ) study of the interaction of  $[\text{Fe}(\text{N}(\text{SiMe}_3)_2)_2]$  with various amounts of  $t\text{BuN}_3$ .

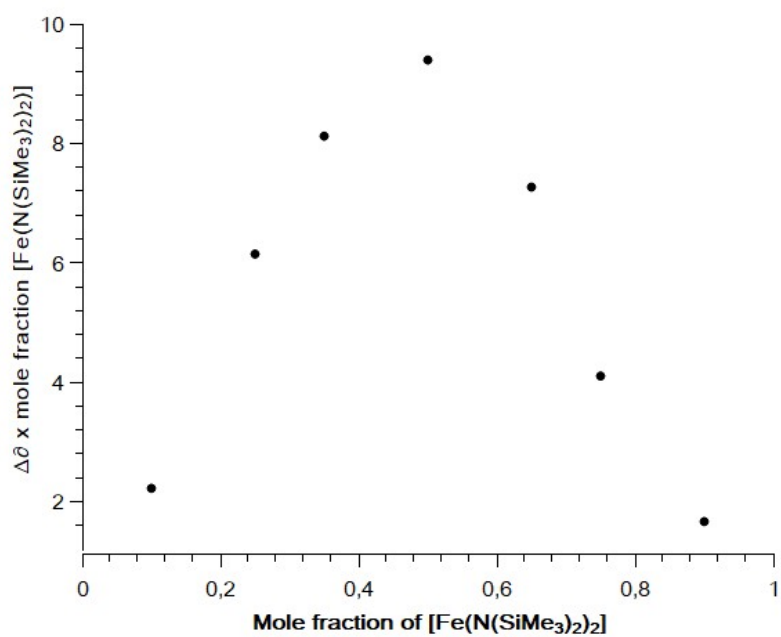

**Figure S 4.** Job plot showing the 1:1 adduct formation of  $t\text{BuN}_3$  with  $[\text{Fe}(\text{N}(\text{SiMe}_3)_2)_2]$  to give 1.

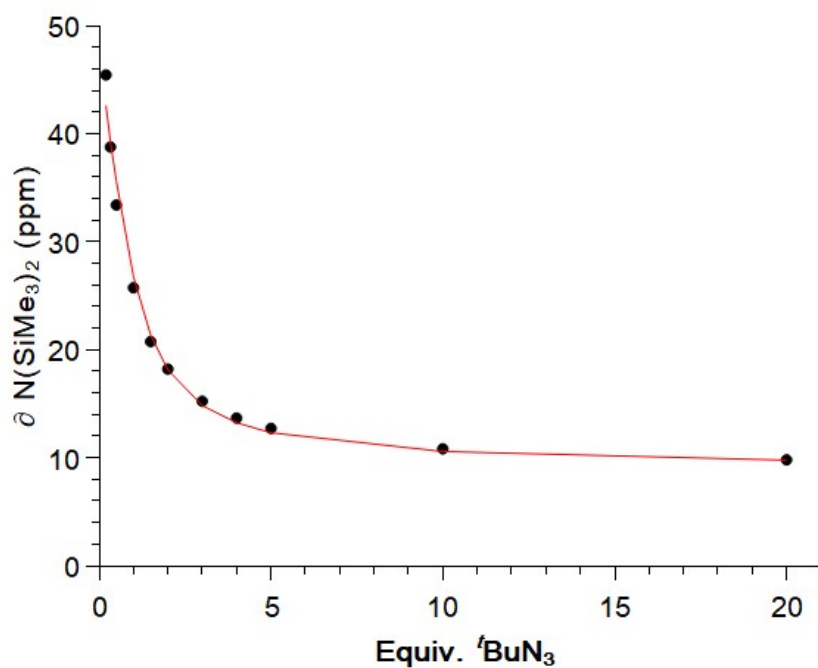

**Figure S 5.** Dependence of the chemical shift of the N(SiMe<sub>3</sub>)<sub>2</sub> signal with  $t\text{BuN}_3$  equivalents, red line represents the fit obtained with bindfit ( $C_{\text{FeNR}_2} = 0.075 \text{ M}$ ).  $K_{\text{eq}} = 35 (\pm 8) \text{ M}^{-1}$  (L-BFGS-B Method).

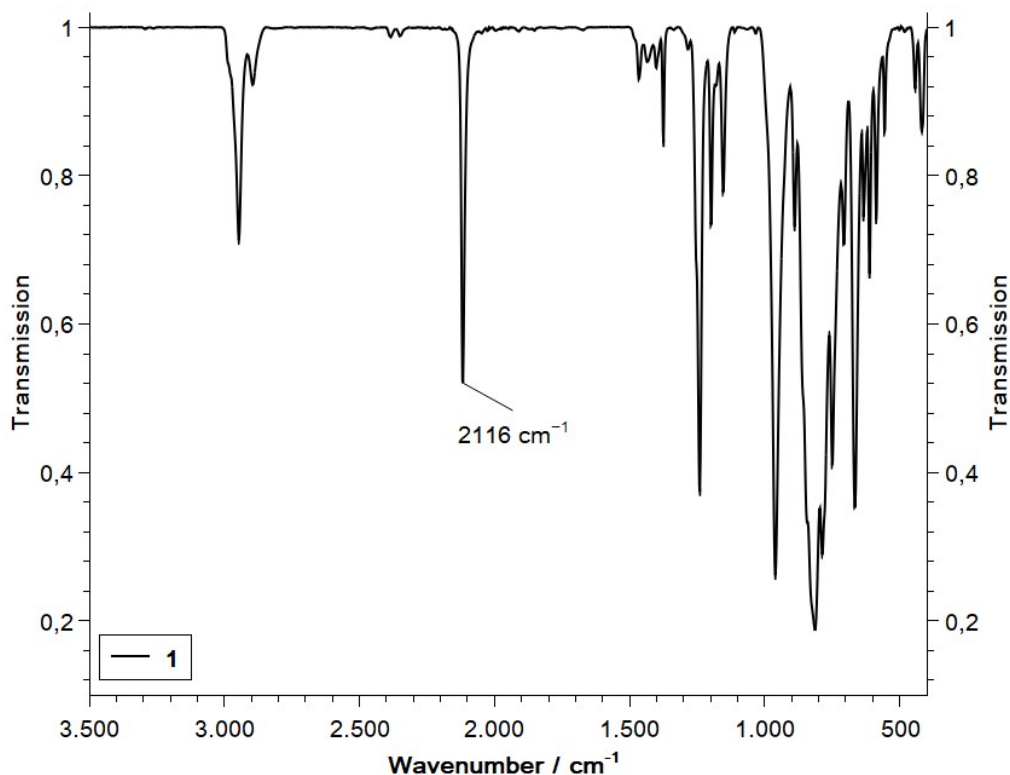

**Figure S 6.** ATR IR spectrum of solid  $[\text{Fe}\{\text{N}_3t\text{Bu}\}(\text{N}(\text{SiMe}_3)_2)_2]$ , **1**.

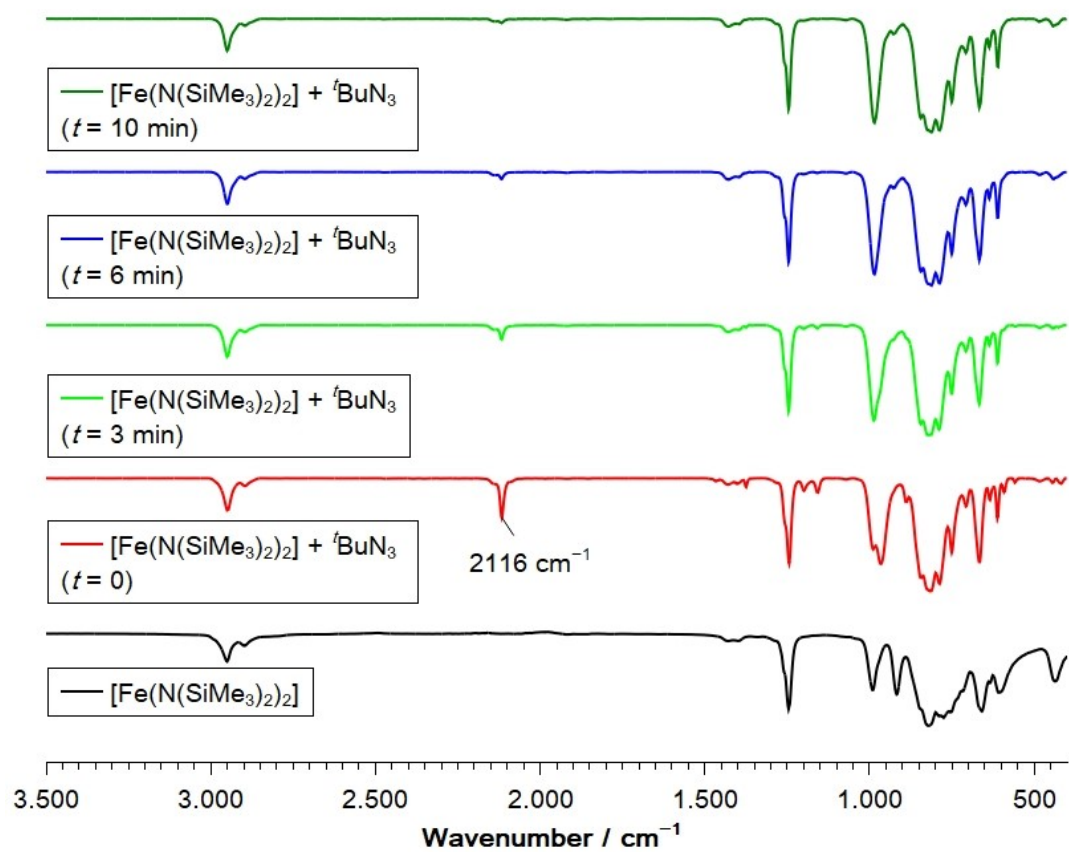

**Figure S 7.** ATR IR spectroscopic study of the reaction between solid [Fe(N(SiMe<sub>3</sub>)<sub>2</sub>)<sub>2</sub>] and <sup>t</sup>BuN<sub>3</sub> over 10 minutes.



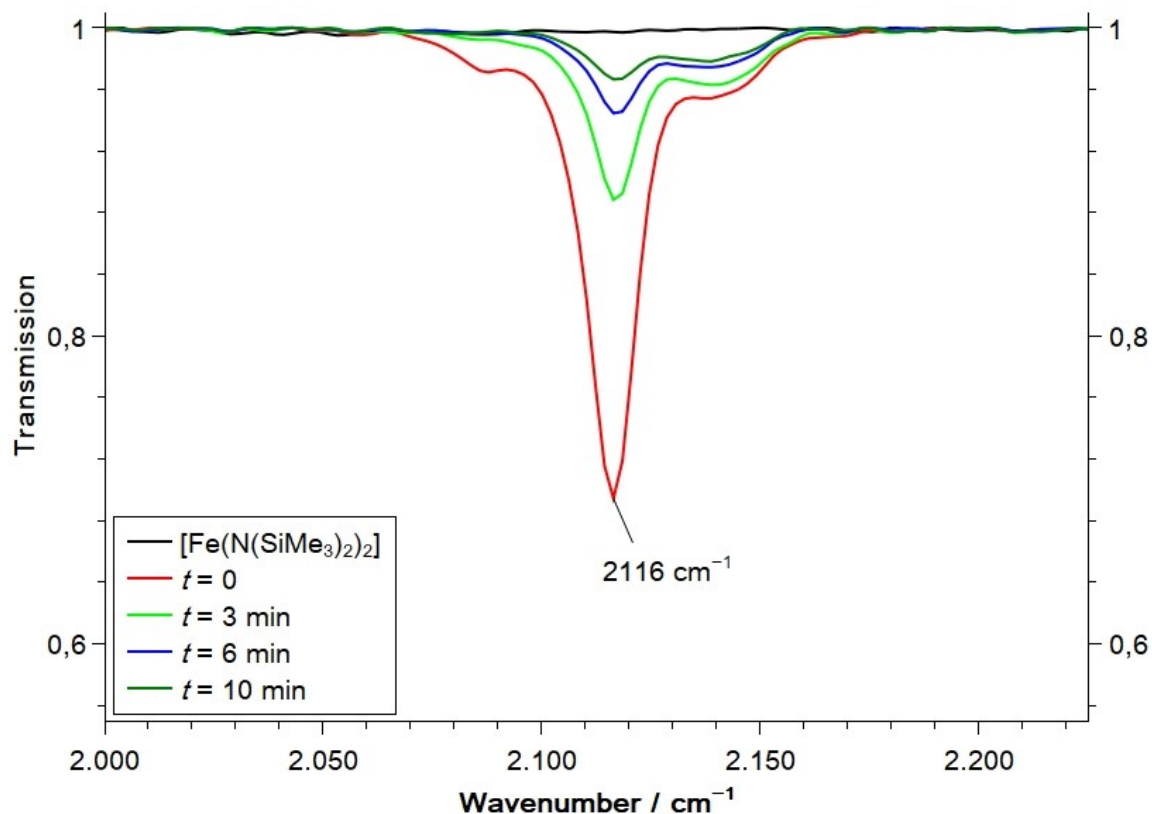

**Figure S 8.** Close up ( $2000 - 2225 \text{ cm}^{-1}$ ) of the ATR IR spectroscopic study of the reaction between solid  $[\text{Fe}(\text{N}(\text{SiMe}_3)_2)_2]$  and  ${}^t\text{BuN}_3$ . The residual signal at  $t = 10$  minutes corresponds to the slight excess of used organic azide.

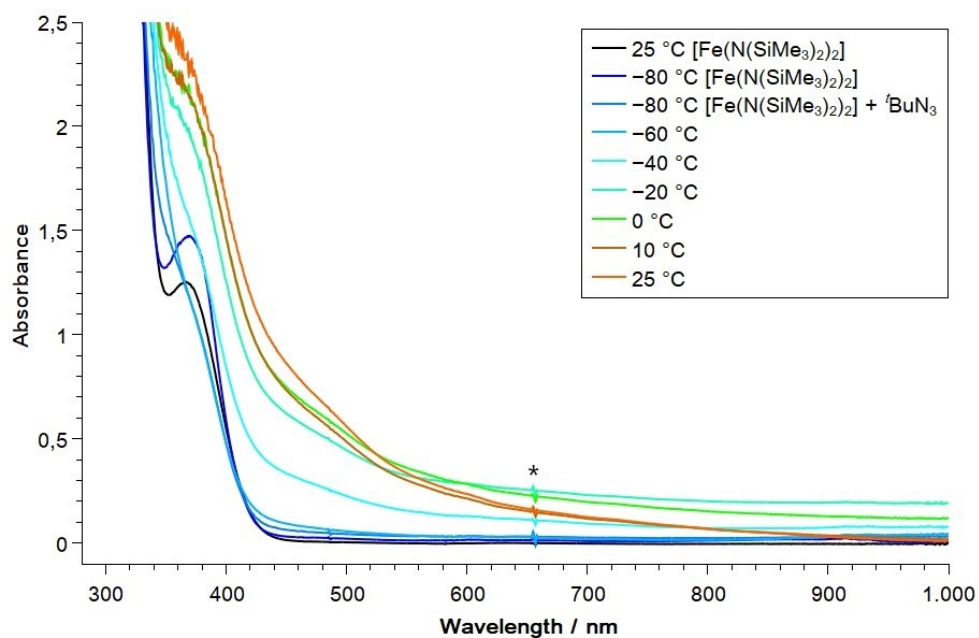

**Figure S 9.** Comparison of the temperature-dependent UV/Vis spectroscopic behaviour of **1** (obtained by mixing  $\text{Fe}(\text{NR}_2)_2$  and  $\text{N}_3{}^t\text{Bu}$ ) with that of pure  $\text{Fe}(\text{NR}_2)_2$  (shown for  $25 \text{ }^\circ\text{C}$  and  $80 \text{ }^\circ\text{C}$ ) in  $n$ -pentane (\* signal caused by lamp change).

Spectra of  $[\text{Fe}(\kappa^2\text{N-N}(\text{SiMe}_3)\text{SiMe}_2\text{CH}_2\text{-NH}^t\text{Bu})(\text{N}(\text{SiMe}_3)_2)]$ , **2**.

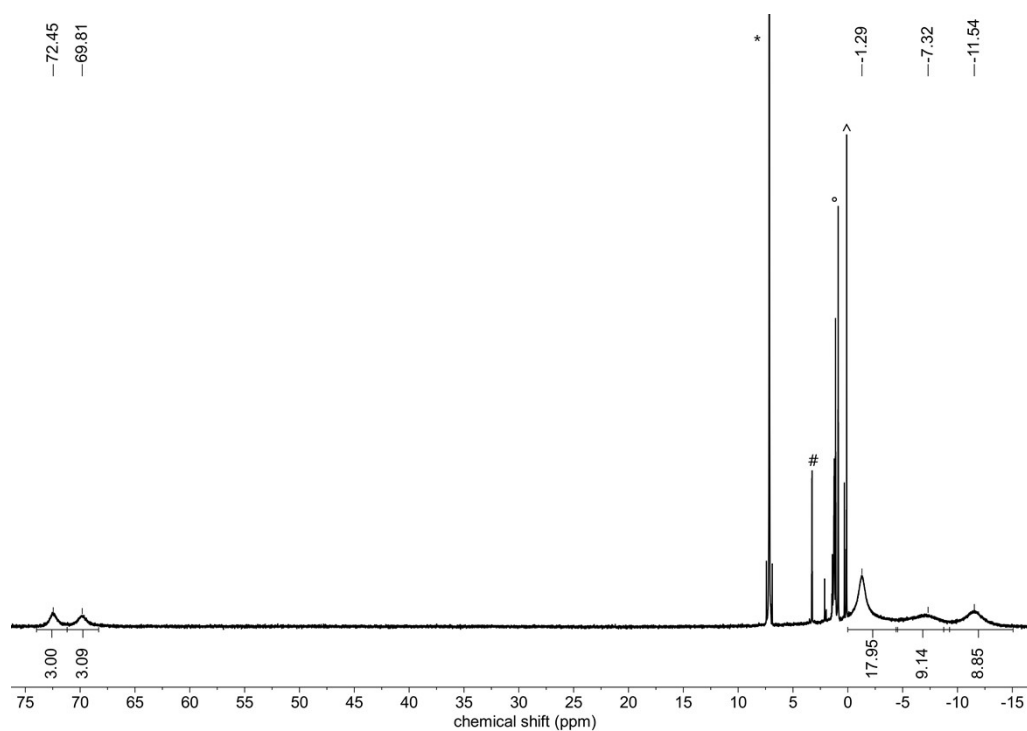

**Figure S 10.**  $^1\text{H}$  NMR spectrum (300 MHz, 300 K, benzene- $\text{d}_6$ ) of  $[\text{Fe}(\kappa^2\text{N-N}(\text{SiMe}_3)\text{SiMe}_2\text{CH}_2\text{-NH}^t\text{Bu})(\text{N}(\text{SiMe}_3)_2)]$ , **2** (\* benzene- $\text{d}_6$ , ° *n*-heptane, # diethyl ether, ^ decomposition).

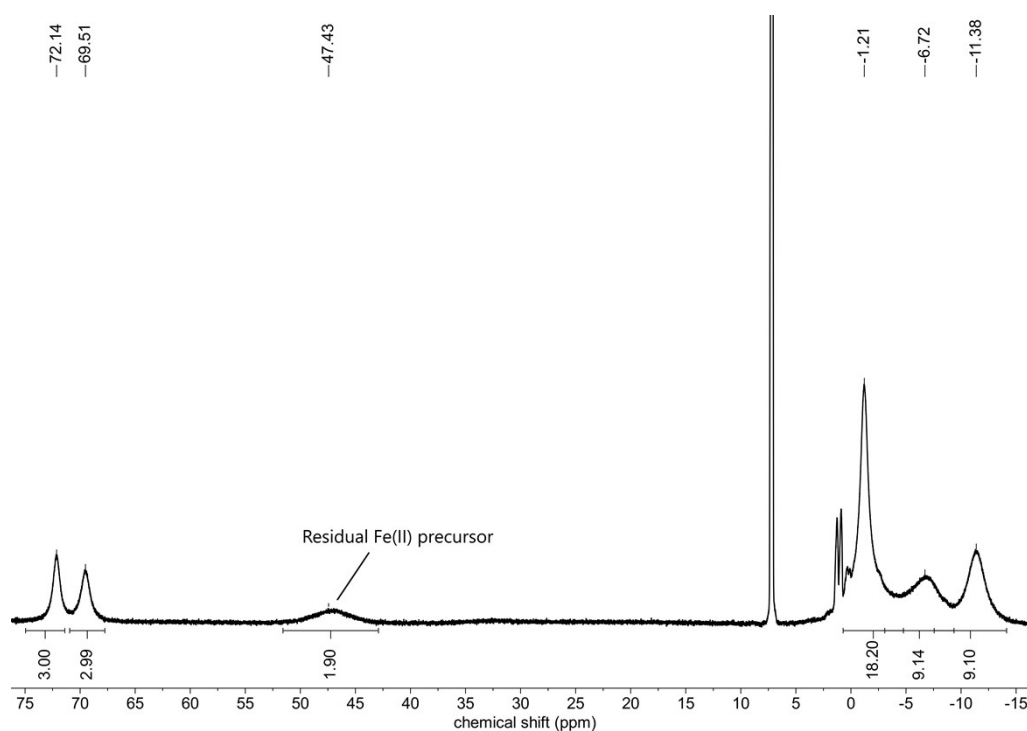

**Figure S 11.**  $^1\text{H}$  NMR spectrum (300 MHz, 300 K, benzene- $\text{d}_6$ ) of crude  $[\text{Fe}(\kappa^2\text{N-N}(\text{SiMe}_3)\text{SiMe}_2\text{CH}_2\text{-NH}^t\text{Bu})(\text{N}(\text{SiMe}_3)_2)]$ , **2**. Comparison with the residual  $\text{Fe}(\text{NR}_2)_2$  signal indicates 95% conversion.

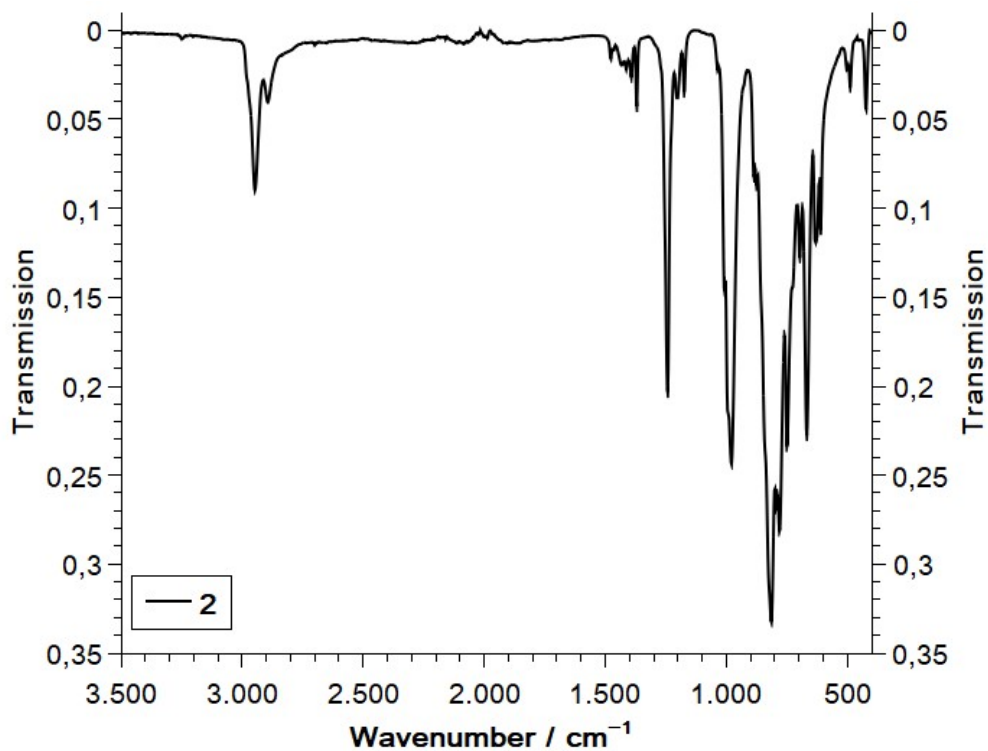

**Figure S 12.** ATR IR spectrum of solid  $[\text{Fe}(\kappa^2\text{N-N}(\text{SiMe}_3)\text{SiMe}_2\text{CH}_2\text{-NH}^t\text{Bu})(\text{N}(\text{SiMe}_3)_2)]$ , **2**.

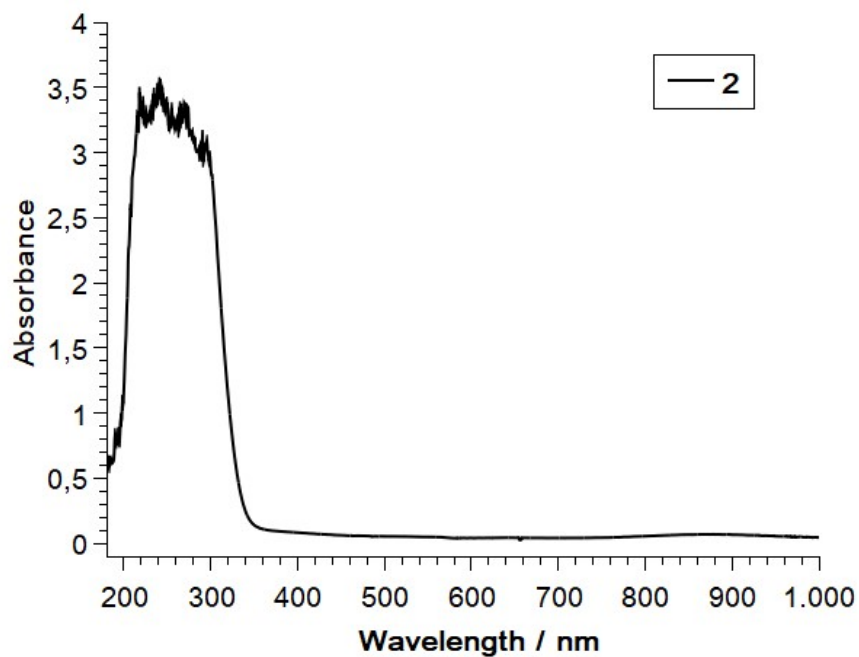

**Figure S 13.** UV-Vis spectrum of  $[\text{Fe}(\kappa^2\text{N-N}(\text{SiMe}_3)\text{SiMe}_2\text{CH}_2\text{-NH}^t\text{Bu})(\text{N}(\text{SiMe}_3)_2)]$ , **2**, in *n*-pentane.

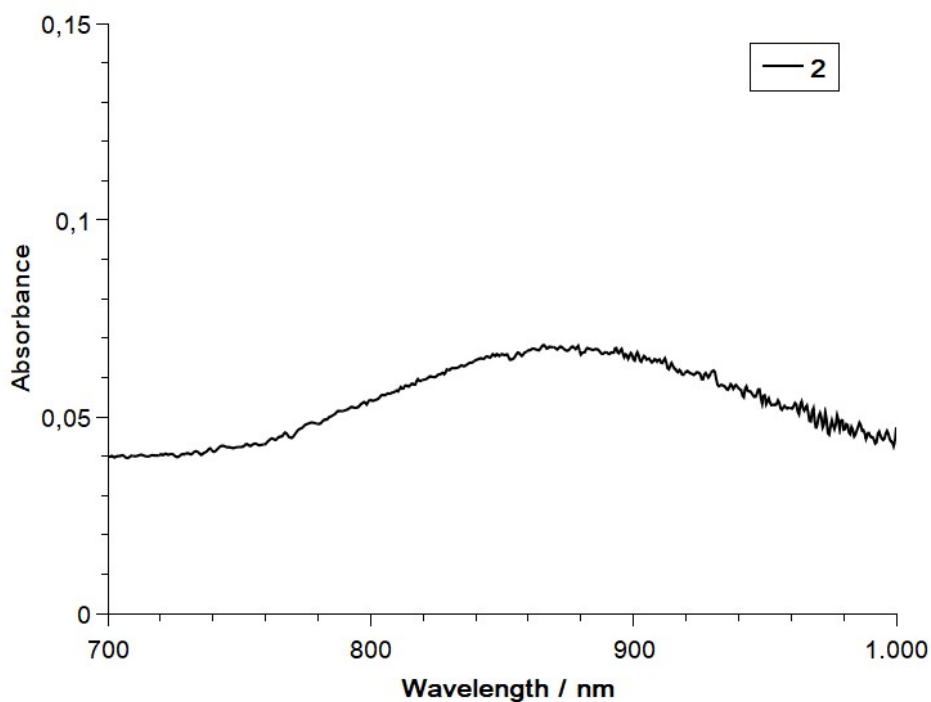

**Figure S 14.** Close-up UV-Vis spectrum of  $[\text{Fe}(\kappa^2\text{N-N}(\text{SiMe}_3)\text{SiMe}_2\text{CH}_2\text{-NH}^t\text{Bu})(\text{N}(\text{SiMe}_3)_2)]$ , **2**, in *n*-pentane in the range of 700–1000 nm.

**Spectra of  $[(\{\text{Me}_3\text{Si}\}_2\text{N})\text{Fe}\{\mu\text{-N}^t\text{Bu-}\mu\text{-}(\text{N}\{\text{SiMe}_3\}_2)\text{Fe}(\text{N}\{\text{SiMe}_3\}_2)]$  (**3**)**

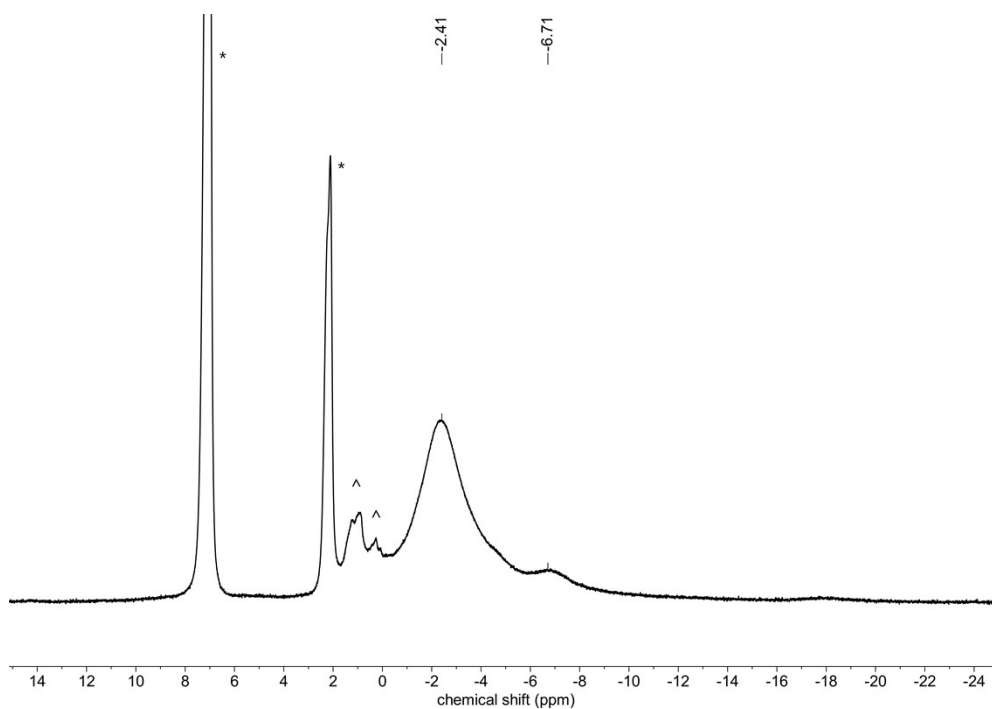

**Figure S 15.**  $^1\text{H}$  NMR spectrum (300 MHz, 300 K, toluene- $\text{d}_8$ ) of  $[(\{\text{Me}_3\text{Si}\}_2\text{N})\text{Fe}\{\mu\text{-N}^t\text{Bu-}\mu\text{-}(\text{N}\{\text{SiMe}_3\}_2)\text{Fe}(\text{N}\{\text{SiMe}_3\}_2)]$ , **3** (\* toluene- $\text{d}_8$ , residual *n*-pentane).

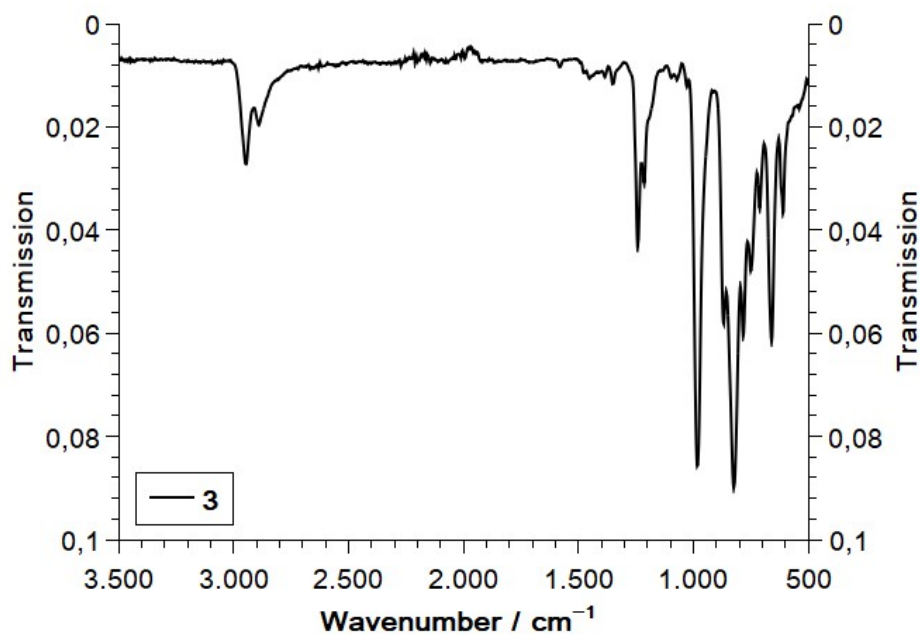

**Figure S 16.** ATR IR spectrum of solid  $[(\text{Me}_3\text{Si})_2\text{N})\text{Fe}\{\mu\text{-N}^t\text{Bu}\}\mu\text{-}(\text{N}\{\text{SiMe}_3\}_2)\text{Fe}(\text{N}\{\text{SiMe}_3\}_2)]$ , **3**.

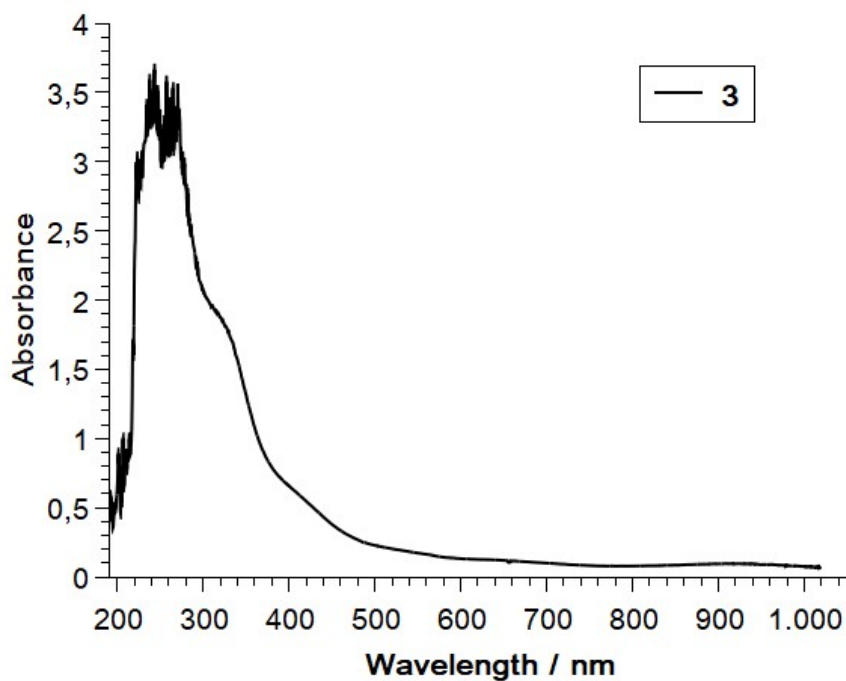

**Figure S 17.** UV-Vis spectrum of  $[(\text{Me}_3\text{Si})_2\text{N})\text{Fe}\{\mu\text{-N}^t\text{Bu}\}\mu\text{-}(\text{N}\{\text{SiMe}_3\}_2)\text{Fe}(\text{N}\{\text{SiMe}_3\}_2)]$ , **3**, in tetrahydrofuran.

## Mössbauer spectroscopy

Mössbauer spectra were recorded with a  $^{57}\text{Co}$  source in a Rh matrix using an alternating constant acceleration Wissel Mössbauer spectrometer operated in transmission mode and equipped with a Janis closed-cycle helium cryostat. Isomer shifts are given relative to iron metal at ambient temperature. Simulation of the experimental data was performed with the Mfit program using Lorentzian line doublets: E. Bill, Max-Planck Institute for Chemical Energy Conversion, Mülheim/Ruhr, Germany.

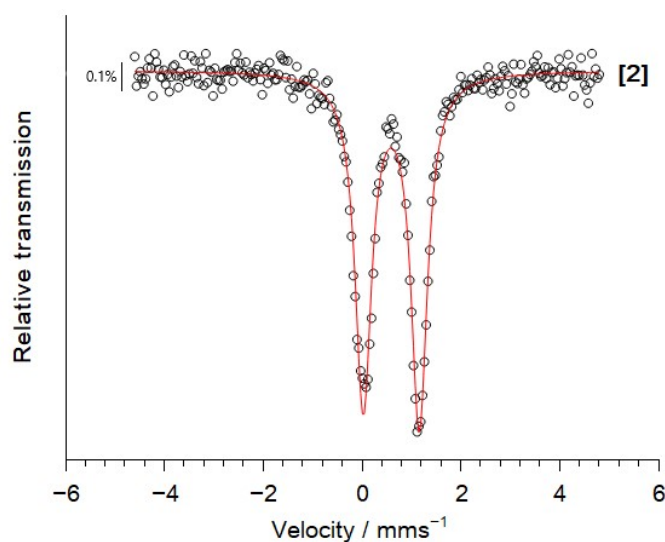

**Figure S 18.** Mössbauer spectrum of solid **2** at 80 K. Parameters for **2**:  $\delta = 0.59 \text{ mm s}^{-1}$ ,  $|\Delta E_Q| = 1.13 \text{ mm s}^{-1}$ .

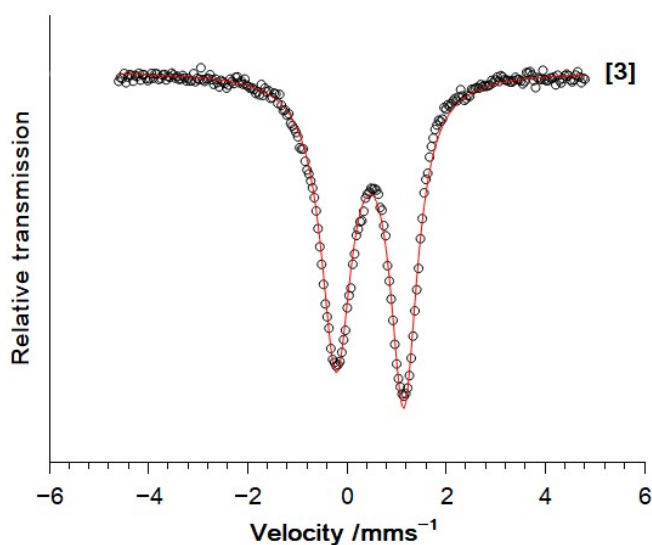

**Figure S 19.** Mössbauer spectrum of solid **3** at 80 K. Parameters for **3**:  $\delta = 0.47 \text{ mm s}^{-1}$ ,  $|\Delta E_Q| = 1.36 \text{ mm s}^{-1}$ .

## X-Ray diffraction analysis and molecular structures

Data for **1** (CCDC 2283997), **2** (CCDC 2283999) and **3** (CCDC 2283998) were collected at 100 K on a Bruker Quest D8 diffractometer using a graphite-monochromated Mo-K $\alpha$  radiation and equipped with an *Oxford Instrument Cooler Device*. For the irradiation experiment (CCDC 2284001, pre-irradiation. CCDC 2283996, 1 h. CCDC 2284000, 3 h) a new crystal was irradiated directly on the goniometer with blue light (Kessel PR160, LED, 40 W, 390 nm) with the N<sub>2</sub>-flow set at 80 K. Data was obtained at 80 K prior irradiation as well as after 1 h and further 2 h of irradiation (3 h total). Longer irradiation was not possible as even after 3 h, substantial degradation of the diffraction pattern and reflex intensity could be seen.

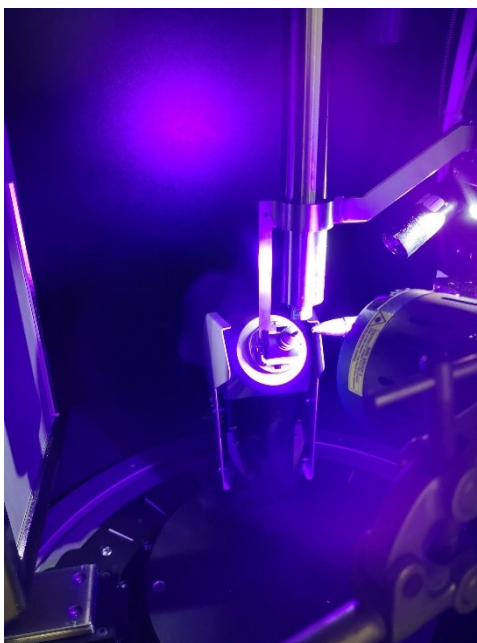

**Figure S 20.** Photo of the irradiation setting for **1**. Distance between lamp and crystal approximately 15 cm.

The structures were solved using either OLEX SHELXT V2014/1<sup>[7]</sup> and refined using least-squares procedures on a F<sup>2</sup> with the aid of the program SHELXL-2016/6<sup>[8]</sup> included in the software package WinGX version 1.63<sup>[9]</sup> or by CRYSTALS<sup>[10]</sup>. The Atomic Scattering Factors were taken from *International Tables for X-Ray Crystallography*<sup>[11]</sup>. All non-hydrogen atoms were refined anisotropically. All hydrogen atoms were refined using a riding model. The absorption correction was introduced using the MULTISCAN and X-Red programs.<sup>[12]</sup> The molecule drawing was performed with the program DIAMOND (Crystal Impact, Bonn, Germany) with 50% probability displacement ellipsoids for non-hydrogen atoms. Depiction of hydrogen atoms is omitted for clarity.

### Crystal data and structure refinements for $[\text{Fe}\{\text{N}_3^t\text{Bu}\}(\text{N}(\text{SiMe}_3)_2)_2]$ , 1.

|                                               |                                                               |
|-----------------------------------------------|---------------------------------------------------------------|
| Empirical formula                             | $\text{C}_{16}\text{H}_{45}\text{FeN}_5\text{Si}_4$           |
| Formula weight                                | 475.78                                                        |
| Temperature/K                                 | 100.00                                                        |
| Crystal system                                | monoclinic                                                    |
| Space group                                   | $P2_1/n$                                                      |
| $a/\text{\AA}$                                | 8.7622(2)                                                     |
| $b/\text{\AA}$                                | 16.0342(7)                                                    |
| $c/\text{\AA}$                                | 20.4887(7)                                                    |
| $\alpha/^\circ$                               | 90                                                            |
| $\beta/^\circ$                                | 101.2450(10)                                                  |
| $\gamma/^\circ$                               | 90                                                            |
| Volume/ $\text{\AA}^3$                        | 2823.29(17)                                                   |
| Z                                             | 4                                                             |
| $\rho_{\text{calc}}/\text{g/cm}^3$            | 1.119                                                         |
| $\mu/\text{mm}^{-1}$                          | 0.714                                                         |
| F(000)                                        | 1032.0                                                        |
| Crystal size/ $\text{mm}^3$                   | $0.2 \times 0.127 \times 0.096$                               |
| Radiation                                     | $\text{MoK}\alpha$ ( $\lambda = 0.71073$ )                    |
| $2\theta$ range for data collection/ $^\circ$ | 4.054 to 59.976                                               |
| Index ranges                                  | $-10 \leq h \leq 12, -22 \leq k \leq 18, -28 \leq l \leq 23$  |
| Reflections collected                         | 24874                                                         |
| Independent reflections                       | 7466 [ $R_{\text{int}} = 0.0390, R_{\text{sigma}} = 0.0494$ ] |
| Data/restraints/parameters                    | 7466/0/244                                                    |
| Goodness-of-fit on $F^2$                      | 1.085                                                         |
| Final R indexes [ $ I  \geq 2\sigma(I)$ ]     | $R_1 = 0.0328, wR_2 = 0.0798$                                 |
| Final R indexes [all data]                    | $R_1 = 0.0483, wR_2 = 0.0835$                                 |
| Largest diff. peak/hole / $e \text{\AA}^{-3}$ | 0.47/-0.38                                                    |

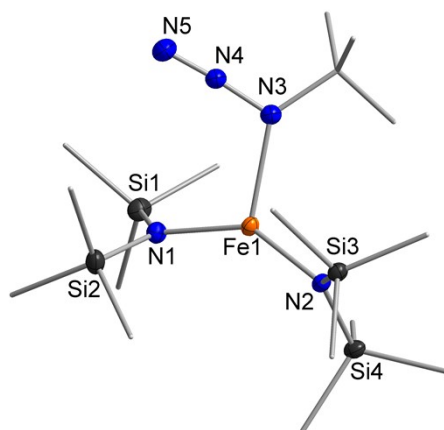

Figure S 21. Molecular structure of  $[\text{Fe}\{\text{N}_3^t\text{Bu}\}(\text{N}(\text{SiMe}_3)_2)_2]$ , 1.

### Crystal data and structure refinements for $[\text{Fe}(\kappa^2\text{N}-\text{N}(\text{SiMe}_3)\text{SiMe}_2\text{CH}_2-\text{NH}^t\text{Bu})(\text{N}(\text{SiMe}_3)_2)]$ , 2.



|                                             |                                                                  |
|---------------------------------------------|------------------------------------------------------------------|
| Empirical formula                           | C <sub>16</sub> H <sub>45</sub> FeN <sub>3</sub> Si <sub>4</sub> |
| Formula weight                              | 447.76                                                           |
| Temperature/K                               | 100.00                                                           |
| Crystal system                              | monoclinic                                                       |
| Space group                                 | P2 <sub>1</sub> /c                                               |
| a/Å                                         | 9.3458(4)                                                        |
| b/Å                                         | 19.5220(7)                                                       |
| c/Å                                         | 15.2414(7)                                                       |
| α/°                                         | 90                                                               |
| β/°                                         | 106.253(2)                                                       |
| γ/°                                         | 90                                                               |
| Volume/Å <sup>3</sup>                       | 2669.64(19)                                                      |
| Z                                           | 4                                                                |
| ρ <sub>calc</sub> /g/cm <sup>3</sup>        | 1.114                                                            |
| μ/mm <sup>-1</sup>                          | 0.749                                                            |
| F(000)                                      | 976.0                                                            |
| Crystal size/mm <sup>3</sup>                | 0.253 × 0.247 × 0.183                                            |
| Radiation                                   | MoKα (λ = 0.71073)                                               |
| 2θ range for data collection/°              | 4.172 to 60.07                                                   |
| Index ranges                                | -12 ≤ h ≤ 12, -27 ≤ k ≤ 21, -19 ≤ l ≤ 21                         |
| Reflections collected                       | 18947                                                            |
| Independent reflections                     | 7221 [R <sub>int</sub> = 0.0441, R <sub>sigma</sub> = 0.0571]    |
| Data/restraints/parameters                  | 7221/7/250                                                       |
| Goodness-of-fit on F <sup>2</sup>           | 1.131                                                            |
| Final R indexes [I >= 2σ (I)]               | R <sub>1</sub> = 0.0424, wR <sub>2</sub> = 0.1086                |
| Final R indexes [all data]                  | R <sub>1</sub> = 0.0592, wR <sub>2</sub> = 0.1139                |
| Largest diff. peak/hole / e Å <sup>-3</sup> | 0.78/-0.78                                                       |

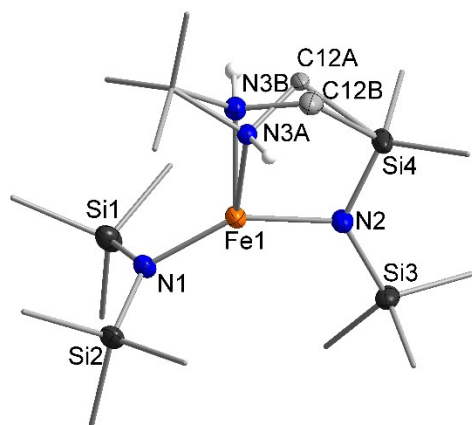

**Figure S 22.** Molecular structure of [Fe( $\kappa^2$ N-N(SiMe<sub>3</sub>)SiMe<sub>2</sub>CH<sub>2</sub>-NH<sup>t</sup>Bu)(N(SiMe<sub>3</sub>)<sub>2</sub>)], **2**, with the depiction of a disorder of the N3 and C12 Atoms. (ratio 0.76:0.24).

**Crystal data and structure refinements for** [(Me<sub>3</sub>Si)<sub>2</sub>N]Fe( $\mu$ -N<sup>t</sup>Bu- $\mu$ -(N{SiMe<sub>3</sub>})<sub>2</sub>)Fe(N{SiMe<sub>3</sub>})<sub>2</sub>], **3**.

|                   |                                                                                 |
|-------------------|---------------------------------------------------------------------------------|
| Empirical formula | C <sub>22</sub> H <sub>63</sub> Fe <sub>2</sub> KN <sub>4</sub> Si <sub>6</sub> |
| Formula weight    | 703.10                                                                          |

|                                             |                                                               |
|---------------------------------------------|---------------------------------------------------------------|
| Temperature/K                               | 100.00                                                        |
| Crystal system                              | monoclinic                                                    |
| Space group                                 | P2 <sub>1</sub> /c                                            |
| a/Å                                         | 9.2649(4)                                                     |
| b/Å                                         | 14.9686(6)                                                    |
| c/Å                                         | 27.6440(11)                                                   |
| α/°                                         | 90                                                            |
| β/°                                         | 93.938(2)                                                     |
| γ/°                                         | 90                                                            |
| Volume/Å <sup>3</sup>                       | 3824.7(3)                                                     |
| Z                                           | 4                                                             |
| ρ <sub>calc</sub> /cm <sup>3</sup>          | 1.221                                                         |
| μ/mm <sup>-1</sup>                          | 1.073                                                         |
| F(000)                                      | 1512.0                                                        |
| Crystal size/mm <sup>3</sup>                | 0.312 × 0.199 × 0.068                                         |
| Radiation                                   | MoKα (λ = 0.71073)                                            |
| 2θ range for data collection/°              | 4.406 to 53.53                                                |
| Index ranges                                | -11 ≤ h ≤ 11, -18 ≤ k ≤ 18, -34 ≤ l ≤ 35                      |
| Reflections collected                       | 95490                                                         |
| Independent reflections                     | 8137 [R <sub>int</sub> = 0.0414, R <sub>sigma</sub> = 0.0185] |
| Data/restraints/parameters                  | 8137/0/392                                                    |
| Goodness-of-fit on F <sup>2</sup>           | 1.101                                                         |
| Final R indexes [I ≥ 2σ (I)]                | R <sub>1</sub> = 0.0284, wR <sub>2</sub> = 0.0632             |
| Final R indexes [all data]                  | R <sub>1</sub> = 0.0329, wR <sub>2</sub> = 0.0648             |
| Largest diff. peak/hole / e Å <sup>-3</sup> | 0.40/-0.36                                                    |

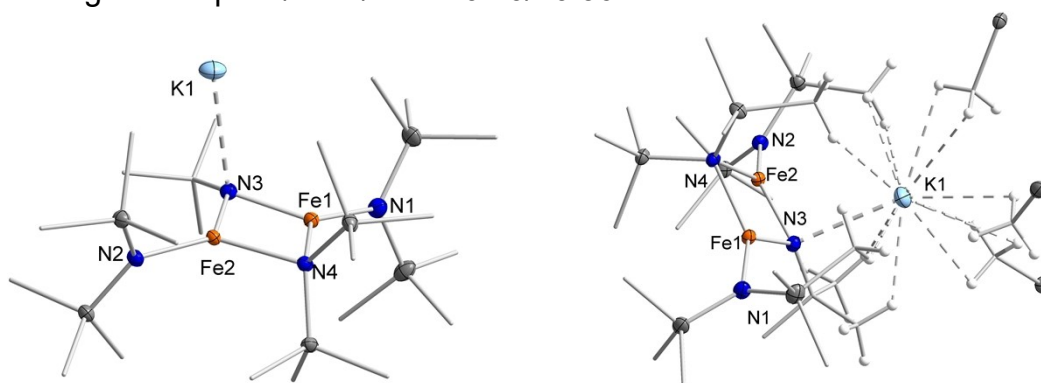

**Figure S 23.** Molecular structure of [({Me<sub>3</sub>Si<sub>2</sub>N}Fe)(μ-N<sup>t</sup>Bu)(μ-(N{SiMe<sub>3</sub>})<sub>2</sub>)] (**3**), (left) and depiction of the K···H interactions with its surroundings (right).

**Crystal data and structure refinements for [Fe(N<sub>3</sub><sup>t</sup>Bu)(N(SiMe<sub>3</sub>)<sub>2</sub>)<sub>2</sub>], **1**, before and after a total of 1h and 3h of irradiation with a blue LED (390 nm).**

| Identification code | GWX203_pre                                                       | GWX203_1h                                                          | GWX203_3h                                                           |
|---------------------|------------------------------------------------------------------|--------------------------------------------------------------------|---------------------------------------------------------------------|
| Empirical formula   | C <sub>16</sub> H <sub>45</sub> FeN <sub>5</sub> Si <sub>4</sub> | C <sub>16</sub> H <sub>45</sub> FeN <sub>4.5</sub> Si <sub>4</sub> | C <sub>16</sub> H <sub>45</sub> FeN <sub>4.31</sub> Si <sub>4</sub> |
| Formula weight      | 475.78                                                           | 468.77                                                             | 466.08                                                              |
| Temperature/K       | 80.00                                                            | 80.00                                                              | 80.00                                                               |

|                                                |                                                                     |                                                                     |                                                                     |
|------------------------------------------------|---------------------------------------------------------------------|---------------------------------------------------------------------|---------------------------------------------------------------------|
| Crystal system                                 | monoclinic                                                          | monoclinic                                                          | monoclinic                                                          |
| Space group                                    | P2 <sub>1</sub> /n                                                  | P2 <sub>1</sub> /n                                                  | P2 <sub>1</sub> /n                                                  |
| a/Å                                            | 8.7573(5)                                                           | 8.883(4)                                                            | 8.8341(17)                                                          |
| b/Å                                            | 16.0324(7)                                                          | 16.016(6)                                                           | 15.935(3)                                                           |
| c/Å                                            | 20.4625(11)                                                         | 20.510(8)                                                           | 20.441(4)                                                           |
| α/°                                            | 90                                                                  | 90                                                                  | 90                                                                  |
| β/°                                            | 101.169(2)                                                          | 100.264(11)                                                         | 100.299(6)                                                          |
| γ/°                                            | 90                                                                  | 90                                                                  | 90                                                                  |
| Volume/Å <sup>3</sup>                          | 2818.5(3)                                                           | 2871(2)                                                             | 2831.2(9)                                                           |
| Z                                              | 4                                                                   | 4                                                                   | 4                                                                   |
| ρ <sub>calc</sub> /cm <sup>3</sup>             | 1.121                                                               | 1.084                                                               | 1.093                                                               |
| μ/mm <sup>-1</sup>                             | 0.715                                                               | 0.701                                                               | 0.710                                                               |
| F(000)                                         | 1032.0                                                              | 1018.0                                                              | 1013.0                                                              |
| Crystal size/mm <sup>3</sup>                   | 0.14 × 0.105 ×<br>0.034                                             | 0.14 × 0.105 ×<br>0.034                                             | 0.14 × 0.105 ×<br>0.034                                             |
| Radiation                                      | MoKα (λ =<br>0.71073)                                               | MoKα (λ =<br>0.71073)                                               | MoKα (λ =<br>0.71073)                                               |
| 2θ range for data<br>collection/°              | 4.782 to 51.994                                                     | 4.738 to 52.098                                                     | 4.762 to 51.992                                                     |
| Index ranges                                   | -10 ≤ h ≤ 10,<br>-19 ≤ k ≤ 19,<br>-25 ≤ l ≤ 25                      | -10 ≤ h ≤ 10,<br>-19 ≤ k ≤ 17,<br>-25 ≤ l ≤ 25                      | -10 ≤ h ≤ 10,<br>-19 ≤ k ≤ 19,<br>-25 ≤ l ≤ 25                      |
| Reflections collected                          | 35127                                                               | 21934                                                               | 58649                                                               |
| Independent reflections                        | 5531 [R <sub>int</sub> =<br>0.0683,<br>R <sub>sigma</sub> = 0.0547] | 5648 [R <sub>int</sub> =<br>0.1210,<br>R <sub>sigma</sub> = 0.1433] | 5558 [R <sub>int</sub> =<br>0.1714,<br>R <sub>sigma</sub> = 0.0960] |
| Data/restraints/<br>parameters                 | 5531/0/244                                                          | 5648/27/318                                                         | 5558/33/318                                                         |
| Goodness-of-fit on F <sup>2</sup>              | 1.075                                                               | 1.029                                                               | 1.100                                                               |
| Final R indexes<br>[I ≥ 2σ (I)]                | R <sub>1</sub> = 0.0314,<br>wR <sub>2</sub> = 0.0673                | R <sub>1</sub> = 0.0694,<br>wR <sub>2</sub> = 0.1597                | R <sub>1</sub> = 0.0821,<br>wR <sub>2</sub> = 0.2032                |
| Final R indexes<br>[all data]                  | R <sub>1</sub> = 0.0458,<br>wR <sub>2</sub> = 0.0698                | R <sub>1</sub> = 0.1289,<br>wR <sub>2</sub> = 0.1807                | R <sub>1</sub> = 0.1301,<br>wR <sub>2</sub> = 0.2175                |
| Largest diff.<br>peak/hole / e Å <sup>-3</sup> | 0.33/-0.26                                                          | 0.80/-0.52                                                          | 1.07/-0.61                                                          |

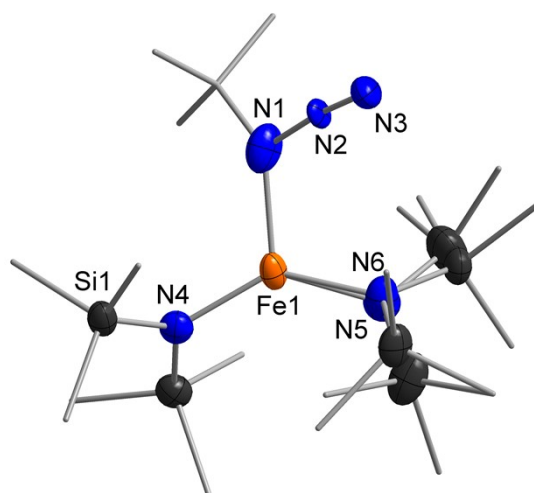

**Figure S 24.** Molecular structure of Molecular structure of  $[\text{Fe}\{\text{N}_3^t\text{Bu}\}(\text{N}(\text{SiMe}_3)_2)_2]$ , **1**, after irradiation (blue LED, 390 nm) of the crystal for a total of 3 h. H atoms are omitted. Depiction of the disorder of one of the  $\text{N}(\text{SiMe}_3)_2$  ligands (ratio 0.8:0.2).

## Quantum chemical calculations

The calculations were performed with ORCA v. 5.0.4.<sup>[13–16]</sup> The structure optimisation for the neutral, putative imido iron complex **[A]** was performed using the the geometric starting points obtained from **1** and removal of its N<sub>2</sub> unit. Geometry optimisation was performed for the singlet, triplet and quintet state using either the r<sup>2</sup>scan-c3 method or the PBE, PBE0 and TPSSh functionals with the ZORA-def2-SVP/C basis set (def2-TZVP on Fe). All optimized structures were verified as true minima by the absence ( $N^{\text{imag}} = 0$ ) of negative eigenvalues in the harmonic vibrational frequency analysis. Single point calculations were performed for the PBE,<sup>[17]</sup> PBE0,<sup>[18]</sup> and TPSSh<sup>[19,20]</sup> functionals, where scalar relativistic effects were modeled under the Zeroth Order Regular Approximation (ZORA)<sup>[21]</sup> and using the ZORA-def2-TZVPP<sup>[22]</sup> basis set. The D4<sup>[23]</sup> dispersion correction was used. The RI approximation with the related auxiliary basis sets (*SARC/J*)<sup>[24]</sup> were used to reduce computation time of calculations using the GGA functionals.

For CASSCF/NEVPT2 calculations on **[A]**, the geometry obtained from the quintet and the triplet state of the TPSSh calculations was used. In view of geometries of the few known examples of trigonal alkyl (calculated) and aryl imido iron complexes bearing a (silyl)amide ligand set in the literature, which estimate Fe–N bond lengths between 1.7 and 1.8 Å with near-linear Fe–N–R angle,<sup>[25,26]</sup> the quintet geometry is deemed the most probable and thus focused on in the main manuscript.

The CASSCF/NEVPT2 calculations were then carried out at the triple- $\zeta$  level of theory (ZORA-def2-TZVPP, *SARC/J*, *autoaux*, *RIJCOSX*), with the active space of CAS[8,7].<sup>[27]</sup> The active space was chosen as to include d-orbitals and the two imido-nitrogen centered  $\pi$ -orbitals. The electronic structure analysis relates to calculations without state averaging, whereas state-averaging was applied to determine the energies of vertically excited states.

Orbitals were depicted with the help of Chemcraft with a contour value of 0.3.

| Multiplicity                | Energy (hartree)        | Fe–<br>N <sub>imido</sub> | Fe–N <sub>imido</sub> –C |
|-----------------------------|-------------------------|---------------------------|--------------------------|
| <b>PBE</b>                  |                         |                           |                          |
| singlet                     | -3240.0803442115        | 1.58                      | 178.3                    |
| singlet (unrestricted)      | -3240.0796608941        | 1.59                      | 172.4                    |
| <b>triplet</b>              | <b>-3240.0881396815</b> | 1.63                      | 147.0                    |
| quintet                     | -3240.0698809797        | 1.69                      | 170.5                    |
| <b>PBE0</b>                 |                         |                           |                          |
| singlet                     | -3240.2503050383        | 1.56                      | 177.6                    |
| singlet (unrestricted)      | -3240.2434702973        | 1.60                      | 157.4                    |
| triplet                     | -3240.2792474365        | 1.67                      | 140.6                    |
| <b>quintet</b>              | <b>-3240.2834031718</b> | 1.73                      | 171.5                    |
| <b>TPSSh</b>                |                         |                           |                          |
| singlet                     | -3242.1745189116        | 1.57                      | 178.5                    |
| singlet (unrestricted)      | -3242.1718165222        | 1.59                      | 165.9                    |
| <b>triplet</b>              | <b>-3242.1914473651</b> | 1.63                      | 145.6                    |
| quintet                     | -3242.1825143341        | 1.70                      | 176.3                    |
| <b>r<sup>2</sup>SCAN-c3</b> |                         |                           |                          |
| singlet                     | -3222.68952576602       | 1.59                      | 176.6                    |
| singlet (unrestricted)      | -3222.69608953512       | 1.62                      | 152.1                    |
| <b>triplet</b>              | <b>-3222.712129</b>     | 1.65                      | 144.4                    |
| quintet                     | -3222.708579            | 1.72                      | 154.4                    |

**Table S 1.** Energy of the obtained from single point calculations using either the PBE, PBE0, TPSSh functional or the r<sup>2</sup>scan-c3 method. Computed M–N<sub>imido</sub> bond length (Å) and M–N<sub>imido</sub>–Mes bond angles (°) are given.

|                             |                    | Mulliken      |              | Löwdin        |              |
|-----------------------------|--------------------|---------------|--------------|---------------|--------------|
| Multiplicity                | Atom               | Atomic charge | Spin density | Atomic charge | Spin density |
| <b>PBE</b>                  |                    |               |              |               |              |
| triplet                     | Fe                 | 0.503844      | 1.929373     | -0.206255     | 1.833271     |
|                             | N <sub>imide</sub> | -0.258658     | -0.046745    | 0.134891      | 0.005477     |
|                             | N <sub>amide</sub> | -0.301222     | -0.021578    | -0.044363     | 0.020528     |
|                             | N <sub>amide</sub> | -0.392384     | 0.031886     | -0.048228     | 0.058557     |
| quintet                     | Fe                 | 0.568701      | 3.296775     | -0.071062     | 3.120789     |
|                             | N <sub>imide</sub> | 0.301944      | 0.234385     | 0.114177      | 0.248311     |
|                             | N <sub>amide</sub> | -0.374419     | 0.098226     | -0.056847     | 0.142654     |
|                             | N <sub>amide</sub> | -0.333840     | 0.178566     | -0.053936     | 0.194024     |
| <b>PBE0</b>                 |                    |               |              |               |              |
| triplet                     | Fe                 | 0.709001      | 2.812369     | -0.073695     | 2.635825     |
|                             | N <sub>imide</sub> | -0.265649     | -0.838980    | 0.158879      | -0.624407    |
|                             | N <sub>amide</sub> | -0.345439     | -0.024477    | -0.078244     | 0.015431     |
|                             | N <sub>amide</sub> | -0.465358     | -0.002275    | -0.079903     | 0.029310     |
| quintet                     | Fe                 | 0.753911      | 4.000840     | 0.099929      | 3.811436     |
|                             | N <sub>imide</sub> | -0.288361     | -0.385701    | 0.137345      | -0.245764    |
|                             | N <sub>amide</sub> | -0.445947     | 0.117461     | -0.095692     | 0.140308     |
|                             | N <sub>amide</sub> | -0.433055     | 0.150357     | -0.099761     | 0.164382     |
| <b>TPSSh</b>                |                    |               |              |               |              |
| triplet                     | Fe                 | 0.683301      | 2.231559     | -0.139495     | 2.099000     |
|                             | N <sub>imide</sub> | -0.359436     | -0.298800    | 0.124715      | -0.189414    |
|                             | N <sub>amide</sub> | -0.395371     | -0.034668    | -0.065044     | 0.012462     |
|                             | N <sub>amide</sub> | 0.496728      | 0.018456     | -0.068689     | 0.048667     |
| quintet                     | Fe                 | 0.775669      | 3.587879     | 0.014760      | 3.396360     |
|                             | N <sub>imide</sub> | -0.370397     | 0.034324     | 0.113711      | 0.093934     |
|                             | N <sub>amide</sub> | -0.477486     | 0.096841     | -0.087429     | 0.139249     |
|                             | N <sub>amide</sub> | -0.460483     | 0.123104     | -0.082037     | 0.156470     |
| <b>r<sup>2</sup>SCAN-c3</b> |                    |               |              |               |              |
| triplet                     | Fe                 | 0.665722      | 2.237534     | 0.818507      | 2.129435     |
|                             | N <sub>imide</sub> | -0.269577     | -0.281250    | -0.563680     | -0.228876    |
|                             | N <sub>amide</sub> | -0.412779     | -0.020165    | -0.807356     | 0.019954     |
|                             | N <sub>amide</sub> | -0.418883     | 0.019883     | -0.821060     | 0.059078     |
| quintet                     | Fe                 | 0.792358      | 3.636900     | 0.989999      | 3.404592     |
|                             | N <sub>imide</sub> | -0.294843     | 0.039638     | -0.601647     | 0.075466     |
|                             | N <sub>amide</sub> | -0.488041     | 0.172965     | -0.849279     | 0.197246     |
|                             | N <sub>amide</sub> | -0.334908     | 0.091821     | -0.837959     | 0.143369     |

**Table S 2.** Mulliken/Löwdin charges and spin densities of the triplet and quintet states obtained from single point calculations using either the PBE, PBE0, TPSSh functional or the r<sup>2</sup>scan-c3 method.

| Functional             | Spin state | Fe-N <sub>imide</sub> | Fe-N <sub>amide</sub> | Fe-N <sub>amide</sub> |
|------------------------|------------|-----------------------|-----------------------|-----------------------|
| PBE                    | triplet    | 2.1001                | 1.1944                | 1.1364                |
|                        | quintet    | 1.8249                | 1.0067                | 1.0391                |
| PBE0                   | triplet    | 1.7870                | 1.0962                | 1.0579                |
|                        | quintet    | 1.5311                | 0.9507                | 0.9778                |
| TPSSh                  | triplet    | 2.0789                | 1.1563                | 1.0952                |
|                        | quintet    | 1.7451                | 0.9778                | 0.9979                |
| r <sup>2</sup> scan-3c | triplet    | 1.9900                | 1.0372                | 0.9915                |
|                        | quintet    | 1.6356                | 0.8655                | 0.8993                |

**Table S 3.** Löwdin bond orders of the triplet and quintet states obtained from single point calculations using either the PBE, PBE0, TPSSh functional or the r<sup>2</sup>scan-c3 method.

| Functional             | Spin state | Fe-N <sub>imide</sub> | Fe-N <sub>amide</sub> | Fe-N <sub>amide</sub> |
|------------------------|------------|-----------------------|-----------------------|-----------------------|
| PBE                    | triplet    | 1.7695                | 0.8746                | 0.7427                |
|                        | quintet    | 1.6293                | 0.7398                | 0.8314                |
| PBE0                   | triplet    | 1.3805                | 0.7861                | 0.6298                |
|                        | quintet    | 1.3269                | 0.7189                | 0.7693                |
| TPSSh                  | triplet    | 1.6538                | 0.7780                | 0.6148                |
|                        | quintet    | 1.4757                | 0.6530                | 0.6810                |
| r <sup>2</sup> scan-3c | triplet    | 1.4916                | 0.9048                | 0.8895                |
|                        | quintet    | 1.3133                | 0.8426                | 0.9545                |

**Table S 4.** Mayer bond orders of the triplet and quintet states obtained from single point calculations using either the PBE, PBE0, TPSSh functional or the r<sup>2</sup>scan-c3 method.

### CASSCF calculations

For the CASSCF/NEVPT2 calculations the geometry of the linear quintet and bent triplet state obtained TPSSh functional was chosen (see Table S1). The active space consists of the 5 d-orbitals and the two  $\pi$ -interacting p<sub>N</sub>-orbitals. Inclusion of the  $\sigma$ -N<sub>p</sub> interaction yields no significant change in spin-state ordering or population of the configurations, but less informative orbital interactions. It was thus excluded.

### Quintet Geometry (TPSSh, Fe-N 1.70 Å, Fe-N-<sup>t</sup>Bu 176°)

LOWEST ROOT (ROOT 0, MULT 5) = -3238.177705037 Eh -88115.295 eV

| State | Root | Mult. | $\Delta E/a.u.$ | $\Delta E/eV$ | $\Delta E/cm^{-1}$ |
|-------|------|-------|-----------------|---------------|--------------------|
| 1:    | 0    | 3     | 0.012932        | 0.352         | 2838.3             |
| 2:    | 1    | 3     | 0.024263        | 0.660         | 5325.1             |
| 3:    | 1    | 5     | 0.027924        | 0.760         | 6128.7             |
| 4:    | 2    | 3     | 0.041749        | 1.136         | 9162.8             |
| 5:    | 0    | 1     | 0.052986        | 1.442         | 11629.1            |
| 6:    | 2    | 5     | 0.062974        | 1.714         | 13821.1            |
| 7:    | 2    | 1     | 0.074096        | 2.016         | 16262.1            |
| 8:    | 1    | 1     | 0.078962        | 2.149         | 17330.2            |
| 9:    | 3    | 3     | 0.080129        | 2.180         | 17586.3            |
| 10:   | 4    | 3     | 0.080708        | 2.196         | 17713.4            |

**Figure S 25.** NEVPT2 transition energies of [A] with regards to the quintet ground state obtained from state-averaged ZORA-def2-TZVPP/CASSCF(8,7) calculations.

### Quintet state (root 0, multiplicity 5)



|            | 118      | 119      | 120     | 121      | 122      | 123      | 124      |
|------------|----------|----------|---------|----------|----------|----------|----------|
|            | -0.44974 | -0.37147 | 0.25867 | -0.24473 | -0.26114 | -0.26898 | -0.01763 |
|            | 1.97335  | 1.54910  | 1.02530 | 1.00022  | 1.00013  | 0.99971  | 0.45219  |
| 0 Fe s     | 0.0      | 0.0      | 0.0     | 0.0      | 0.0      | 1.9      | 0.0      |
| 0 Fe pz    | 0.2      | 1.9      | 0.0     | 0.9      | 0.1      | 0.2      | 0.1      |
| 0 Fe px    | 1.4      | 0.6      | 0.2     | 0.6      | 0.2      | 0.1      | 0.1      |
| 0 Fe py    | 1.7      | 1.1      | 0.2     | 0.2      | 0.1      | 0.1      | 0.1      |
| 0 Fe dz2   | 1.4      | 31.8     | 6.7     | 13.3     | 1.0      | 10.5     | 31.9     |
| 0 Fe dxz   | 1.1      | 4.0      | 4.9     | 54.2     | 5.5      | 20.2     | 3.4      |
| 0 Fe dyz   | 5.8      | 0.3      | 27.9    | 15.3     | 45.2     | 0.4      | 0.2      |
| 0 Fe dx2y2 | 8.9      | 0.0      | 42.8    | 2.7      | 42.4     | 3.3      | 0.0      |
| 0 Fe dxy   | 0.9      | 12.8     | 4.3     | 6.2      | 0.1      | 59.1     | 12.6     |
| 1 N pz     | 3.6      | 18.8     | 0.4     | 0.2      | 0.1      | 0.4      | 19.2     |
| 1 N px     | 29.1     | 5.7      | 3.8     | 0.2      | 0.1      | 0.5      | 6.0      |
| 1 N py     | 33.3     | 13.0     | 4.6     | 0.1      | 0.0      | 0.2      | 14.1     |

**Figure S 26.** Reduced Löwdin population analysis of active space in CASSCF(8,7) of quintet

**A.**

0.67123 [ 111]: 2211110  
 0.17975 [ 96]: 2111111  
 0.12198 [ 81]: 2011112  
 0.01992 [ 53]: 1121111  
 0.00321 [ 21]: 1021112

**Figure S 27.** Configuration of ground state of of quintet **A** as obtained by CASSCF(8,7).

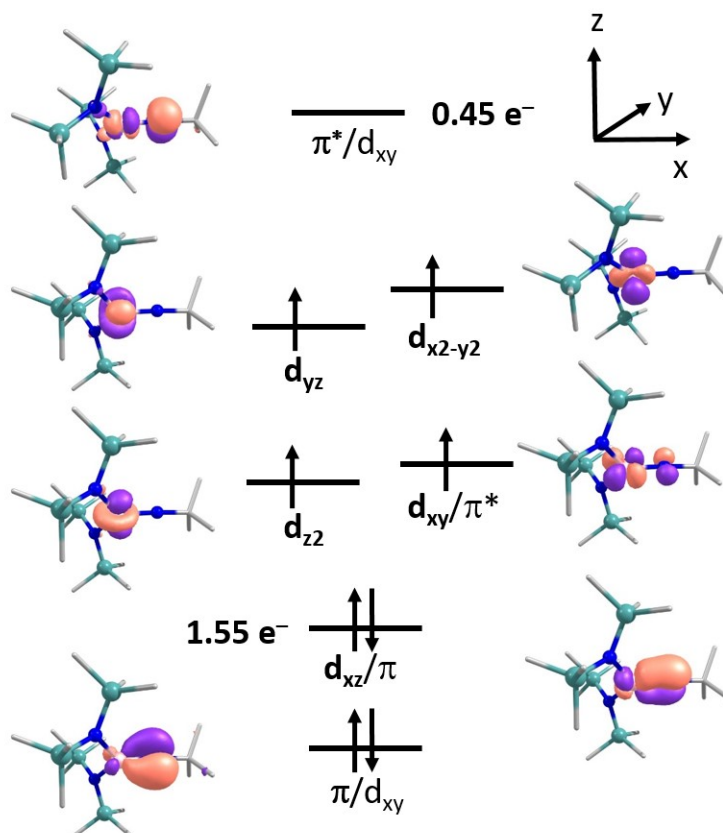

**Figure S 28.** Orbital scheme of the active space from CASSCF(8,7) of quintet **A**.

## Triplet Geometry (TPSSh, Fe–N 1.63, Fe–N–tBu 145.6°)

LOWEST ROOT (ROOT 0, MULT 3) = -3238.179705217 Eh -88115.349 eV

| STATE | ROOT | MULT | $\Delta E/a.u.$ | $\Delta E/eV$ | $\Delta E/cm^{**}-1$ |
|-------|------|------|-----------------|---------------|----------------------|
| 1:    | 1    | 3    | 0.013071        | 0.356         | 2868.7               |
| 2:    | 0    | 5    | 0.022514        | 0.613         | 4941.4               |
| 3:    | 2    | 3    | 0.026141        | 0.711         | 5737.2               |
| 4:    | 1    | 5    | 0.036787        | 1.001         | 8073.8               |
| 5:    | 0    | 1    | 0.050521        | 1.375         | 11088.0              |
| 6:    | 1    | 1    | 0.059976        | 1.632         | 13163.1              |
| 7:    | 2    | 1    | 0.064963        | 1.768         | 14257.8              |
| 8:    | 4    | 1    | 0.079943        | 2.175         | 17545.4              |
| 9:    | 3    | 1    | 0.080096        | 2.180         | 17579.1              |
| 10:   | 2    | 5    | 0.081746        | 2.224         | 17941.3              |
| 11:   | 3    | 3    | 0.089534        | 2.436         | 19650.5              |
| 12:   | 4    | 3    | 0.098539        | 2.681         | 21626.7              |

**Figure S 29.** NEVPT2 transition energies of [A] with regards to the triplet ground state obtained from state-averaged ZORA-def2-TZVPP/CASSCF(10,8) calculations.

### Triplet state (root 0, multiplicity 3)

|            | 114      | 115      | 116      | 117      | 118      | 119      |
|------------|----------|----------|----------|----------|----------|----------|
|            | -0.39505 | -0.38122 | -0.34823 | -0.59145 | -0.59506 | -0.43756 |
|            | 2.00000  | 2.00000  | 2.00000  | 1.98801  | 1.98510  | 1.81294  |
| 0 Fe dz2   | 0.0      | 0.1      | 0.1      | 0.9      | 8.1      | 7.6      |
| 0 Fe dyz   | 0.1      | 0.9      | 0.1      | 31.4     | 14.4     | 0.9      |
| 0 Fe dx2y2 | 0.0      | 0.9      | 0.1      | 41.1     | 1.7      | 14.2     |
| 0 Fe dxy   | 0.4      | 0.1      | 0.1      | 7.1      | 1.5      | 19.4     |
| 1 N s      | 0.0      | 0.2      | 0.0      | 0.3      | 9.4      | 0.1      |
| 1 N px     | 0.0      | 1.5      | 0.0      | 1.5      | 12.1     | 19.0     |
| 1 N py     | 0.2      | 0.4      | 0.2      | 2.5      | 20.5     | 27.6     |
| 2 N pz     | 5.9      | 0.9      | 0.0      | 0.4      | 0.1      | 0.1      |
| 2 N px     | 1.1      | 2.0      | 19.2     | 1.6      | 3.5      | 0.3      |
| 2 N py     | 2.9      | 8.7      | 8.9      | 0.0      | 0.0      | 0.0      |
| 3 N pz     | 5.2      | 5.2      | 0.5      | 0.4      | 0.9      | 0.0      |
| 3 N px     | 1.6      | 4.7      | 14.1     | 1.9      | 6.0      | 0.0      |
| 3 N py     | 1.8      | 8.3      | 4.7      | 0.1      | 0.4      | 0.0      |
|            | 120      | 121      | 122      | 123      | 124      | 125      |
|            | -0.40197 | -0.14827 | -0.14444 | 0.08287  | 0.13335  | 0.11450  |
|            | 1.77537  | 1.01630  | 0.99993  | 0.23155  | 0.19080  | 0.00000  |
| 0 Fe s     | 0.0      | 0.1      | 0.0      | 0.0      | 0.0      | 5.2      |
| 0 Fe dz2   | 0.2      | 13.8     | 53.0     | 0.4      | 14.1     | 0.4      |
| 0 Fe dxz   | 40.4     | 4.8      | 0.2      | 50.4     | 0.3      | 0.1      |
| 0 Fe dyz   | 0.0      | 12.7     | 29.2     | 0.0      | 3.6      | 0.1      |
| 0 Fe dx2y2 | 0.2      | 4.3      | 14.2     | 0.1      | 23.7     | 0.2      |
| 0 Fe dxy   | 1.9      | 52.4     | 0.0      | 2.9      | 15.1     | 0.5      |
| 1 N pz     | 44.3     | 0.3      | 0.0      | 32.5     | 0.2      | 0.0      |
| 1 N px     | 0.2      | 0.0      | 0.0      | 0.1      | 15.6     | 0.0      |
| 1 N py     | 1.1      | 3.3      | 0.0      | 1.3      | 13.9     | 0.2      |
| 35 H s     | 0.0      | 0.0      | 0.0      | 0.0      | 0.0      | 5.2      |

**Figure S 30.** Reduced Löwdin population analysis of active space in CASSCF(10,8) of triplet A.

```

ROOT 0: E= -3232.6650269791 Eh
0.76049 [ 727]: 22221100
0.04733 [ 700]: 22201120
0.04402 [ 667]: 22111111
0.04136 [ 717]: 22211110
0.03360 [ 634]: 22021102
0.02811 [ 687]: 22121101
0.00770 [ 607]: 22001122
0.00410 [ 589]: 21212110
0.00374 [ 617]: 22011112
0.00317 [ 647]: 22101121
0.00310 [ 553]: 21122101

```

**Figure S 31.** Configuration of ground state of of triplet **A** as obtained by CASSCF(10,8).

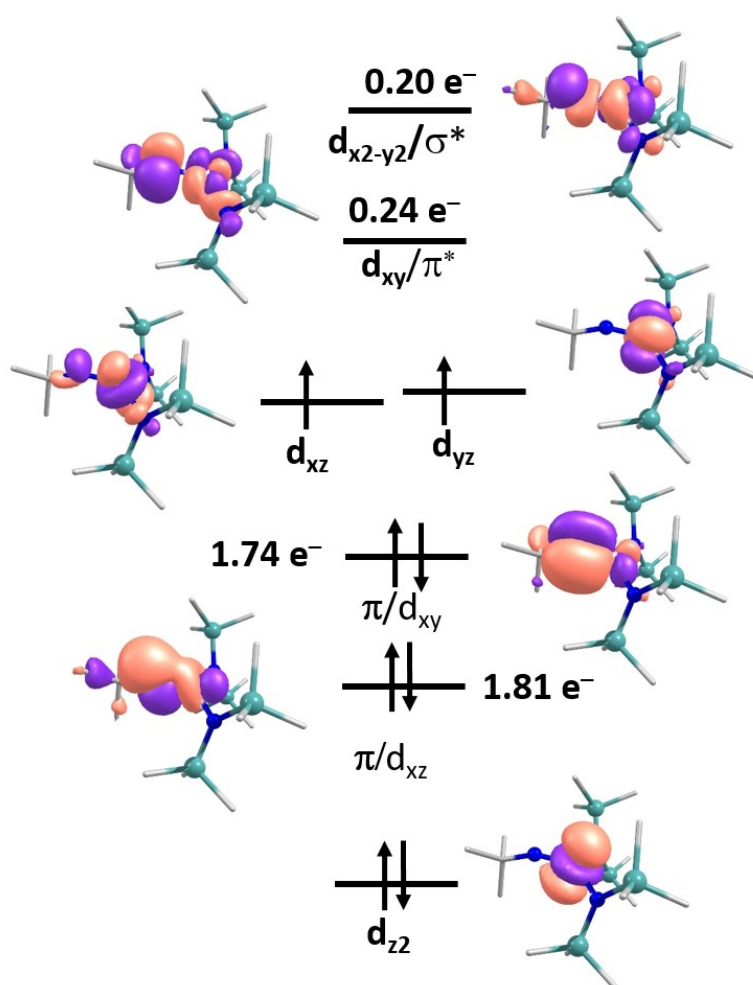

**Figure S 32.** Orbital scheme of the active space from CASSCF(8,7) of triplet **A**.

**XYZ-Coordinates of quintet [A] (from TPSSh) used for the CASSCF calculations**

|    |              |              |              |
|----|--------------|--------------|--------------|
| Fe | 1.168916000  | 12.033158000 | 12.538823000 |
| N  | 2.298235000  | 12.685449000 | 13.625608000 |
| N  | -0.047040000 | 10.682108000 | 12.985368000 |
| N  | 1.197895000  | 12.451991000 | 10.719417000 |
| Si | 2.817789000  | 12.610433000 | 10.034702000 |
| C  | 3.542748000  | 14.312677000 | 10.423687000 |
| C  | 3.925831000  | 11.263374000 | 10.768352000 |

|    |              |              |              |
|----|--------------|--------------|--------------|
| C  | 2.793078000  | 12.344074000 | 8.159650000  |
| Si | -0.263115000 | 12.998224000 | 9.898109000  |
| C  | -0.812981000 | 11.837994000 | 8.510238000  |
| C  | 0.021906000  | 14.724998000 | 9.166073000  |
| C  | -1.680489000 | 13.134651000 | 11.137923000 |
| Si | 0.384833000  | 9.070373000  | 12.406182000 |
| C  | 0.511275000  | 9.024815000  | 10.524420000 |
| C  | -0.896919000 | 7.770792000  | 12.911150000 |
| C  | 2.056516000  | 8.580679000  | 13.156118000 |
| Si | -1.008312000 | 10.970753000 | 14.434949000 |
| C  | -0.300843000 | 10.054495000 | 15.935399000 |
| C  | -1.028573000 | 12.826846000 | 14.821347000 |
| C  | -2.809242000 | 10.443072000 | 14.188449000 |
| C  | 3.185489000  | 13.216420000 | 14.603136000 |
| C  | 2.911837000  | 14.726650000 | 14.786509000 |
| C  | 2.921401000  | 12.467199000 | 15.932176000 |
| C  | 4.650737000  | 12.987923000 | 14.166813000 |
| H  | -0.022333000 | 11.667792000 | 7.770181000  |
| H  | -1.675732000 | 12.273493000 | 7.987025000  |
| H  | -1.116970000 | 10.863924000 | 8.909641000  |
| H  | 2.977939000  | 15.105607000 | 9.917920000  |
| H  | 4.592451000  | 14.388266000 | 10.109114000 |
| H  | 3.492154000  | 14.502264000 | 11.502961000 |
| H  | 3.953017000  | 11.318074000 | 11.863614000 |
| H  | 4.956747000  | 11.368524000 | 10.403133000 |
| H  | 3.568727000  | 10.265262000 | 10.483370000 |
| H  | 3.074211000  | 15.260643000 | 13.843630000 |
| H  | 3.581130000  | 15.148918000 | 15.546683000 |
| H  | 1.875203000  | 14.890289000 | 15.101337000 |
| H  | 1.889533000  | 12.622123000 | 16.263655000 |
| H  | 3.600757000  | 12.840751000 | 16.708298000 |
| H  | 3.090085000  | 11.392927000 | 15.801335000 |
| H  | 0.299768000  | 15.437652000 | 9.953586000  |
| H  | -0.898261000 | 15.090088000 | 8.689099000  |
| H  | 0.814352000  | 14.736228000 | 8.407530000  |
| H  | 2.422417000  | 11.340315000 | 7.915724000  |
| H  | 3.815396000  | 12.429099000 | 7.765725000  |
| H  | 2.171896000  | 13.075050000 | 7.628297000  |
| H  | -0.336425000 | 8.965949000  | 15.801229000 |
| H  | -0.870963000 | 10.295096000 | 16.843325000 |
| H  | 0.745047000  | 10.336313000 | 16.106444000 |
| H  | -0.488296000 | 9.038234000  | 10.071965000 |
| H  | 1.016011000  | 8.105461000  | 10.197947000 |
| H  | 1.062832000  | 9.887857000  | 10.135957000 |
| H  | -0.022121000 | 13.264206000 | 14.839849000 |
| H  | -1.480953000 | 12.989121000 | 15.809626000 |
| H  | -1.629286000 | 13.379347000 | 14.088742000 |
| H  | -1.858287000 | 12.173921000 | 11.634961000 |
| H  | -2.601540000 | 13.434533000 | 10.619362000 |
| H  | -1.473658000 | 13.891752000 | 11.905859000 |
| H  | 4.853402000  | 11.916361000 | 14.061570000 |

|   |              |              |              |
|---|--------------|--------------|--------------|
| H | 5.338464000  | 13.402643000 | 14.914491000 |
| H | 4.847631000  | 13.474518000 | 13.205495000 |
| H | -1.017687000 | 7.679316000  | 13.997316000 |
| H | -0.571142000 | 6.792514000  | 12.530854000 |
| H | -1.878478000 | 7.988447000  | 12.472190000 |
| H | 2.846305000  | 9.289369000  | 12.874212000 |
| H | 2.370187000  | 7.581493000  | 12.823645000 |
| H | 1.994763000  | 8.572338000  | 14.252188000 |
| H | -3.235685000 | 10.911597000 | 13.292394000 |
| H | -3.408853000 | 10.761730000 | 15.052573000 |
| H | -2.916722000 | 9.357278000  | 14.089032000 |

**XYZ-Coordinates of triplet [A] (from TPSSh) used for the CASSCF calculations**

|    |              |              |              |
|----|--------------|--------------|--------------|
| Fe | 0.000000000  | 0.000000000  | 0.000000000  |
| N  | 1.629728000  | 0.000000000  | 0.000000000  |
| N  | -0.853518000 | -0.776373000 | 1.397214000  |
| N  | -0.901027000 | 0.590039000  | -1.473544000 |
| Si | -0.591851000 | -0.091710000 | -3.073509000 |
| C  | 1.026275000  | 0.609842000  | -3.758459000 |
| C  | -0.511267000 | -1.977960000 | -3.017383000 |
| C  | -1.995122000 | 0.330357000  | -4.275406000 |
| Si | -1.696415000 | 2.156961000  | -1.239815000 |
| C  | -3.557524000 | 1.991942000  | -1.530312000 |
| C  | -0.971901000 | 3.462766000  | -2.403810000 |
| C  | -1.452269000 | 2.777366000  | 0.527527000  |
| Si | -1.869558000 | -2.186817000 | 1.024736000  |
| C  | -3.111206000 | -1.779185000 | -0.335138000 |
| C  | -2.910391000 | -2.728875000 | 2.514250000  |
| C  | -0.767400000 | -3.643886000 | 0.537971000  |
| Si | -0.418538000 | -0.286645000 | 3.050357000  |
| C  | 0.375881000  | -1.726199000 | 3.993621000  |
| C  | 0.796434000  | 1.157241000  | 3.069652000  |
| C  | -1.964698000 | 0.278943000  | 3.986175000  |
| C  | 2.820083000  | -0.801524000 | -0.144617000 |
| C  | 3.962313000  | 0.166538000  | -0.526309000 |
| C  | 3.114207000  | -1.458754000 | 1.220818000  |
| C  | 2.673255000  | -1.898462000 | -1.213547000 |
| H  | -3.796945000 | 1.667617000  | -2.549093000 |
| H  | -4.051182000 | 2.958392000  | -1.358047000 |
| H  | -3.987968000 | 1.262277000  | -0.833415000 |
| H  | 0.911731000  | 1.670437000  | -4.014760000 |
| H  | 1.346830000  | 0.075182000  | -4.662781000 |
| H  | 1.824706000  | 0.536994000  | -3.010642000 |
| H  | 0.189111000  | -2.342446000 | -2.260986000 |
| H  | -0.183919000 | -2.363965000 | -3.992762000 |
| H  | -1.496576000 | -2.407448000 | -2.800605000 |
| H  | 3.754796000  | 0.640917000  | -1.491780000 |
| H  | 4.911702000  | -0.378462000 | -0.600271000 |
| H  | 4.061827000  | 0.952633000  | 0.229850000  |
| H  | 3.220619000  | -0.701730000 | 2.004949000  |
| H  | 4.045187000  | -2.036557000 | 1.163966000  |

|   |              |              |              |
|---|--------------|--------------|--------------|
| H | 2.296511000  | -2.134204000 | 1.493094000  |
| H | 0.103998000  | 3.581686000  | -2.221318000 |
| H | -1.454567000 | 4.434305000  | -2.229517000 |
| H | -1.108804000 | 3.209278000  | -3.461999000 |
| H | -2.945350000 | -0.101416000 | -3.936425000 |
| H | -1.763807000 | -0.104723000 | -5.257885000 |
| H | -2.139447000 | 1.407790000  | -4.418205000 |
| H | -0.267297000 | -2.613441000 | 4.026318000  |
| H | 0.577167000  | -1.423946000 | 5.030799000  |
| H | 1.330428000  | -2.019723000 | 3.541255000  |
| H | -3.895182000 | -1.123753000 | 0.066147000  |
| H | -3.592511000 | -2.695395000 | -0.703076000 |
| H | -2.643992000 | -1.259561000 | -1.176232000 |
| H | 1.685353000  | 0.958733000  | 2.462125000  |
| H | 1.112047000  | 1.338184000  | 4.107055000  |
| H | 0.333599000  | 2.077431000  | 2.695495000  |
| H | -1.823536000 | 2.053981000  | 1.263189000  |
| H | -2.006906000 | 3.716741000  | 0.663697000  |
| H | -0.394883000 | 2.976376000  | 0.741352000  |
| H | 1.883024000  | -2.600841000 | -0.928899000 |
| H | 3.613192000  | -2.456463000 | -1.308785000 |
| H | 2.428361000  | -1.465380000 | -2.187927000 |
| H | -2.325380000 | -2.968868000 | 3.409214000  |
| H | -3.454992000 | -3.638529000 | 2.223372000  |
| H | -3.656950000 | -1.971279000 | 2.781370000  |
| H | -0.196685000 | -3.425727000 | -0.371824000 |
| H | -1.362736000 | -4.548467000 | 0.353591000  |
| H | -0.051842000 | -3.865527000 | 1.340737000  |
| H | -2.520592000 | 1.031444000  | 3.412436000  |
| H | -1.663291000 | 0.739908000  | 4.937158000  |
| H | -2.647395000 | -0.545678000 | 4.217209000  |

## References

- [1] <http://supramolecular.org>.
- [2] Brynn Hibbert, D.; Thordarson, P. *Chem. Commun.* **2016**, 52, 12792–12805.
- [3] Evans, D. F. *J. Chem. Soc.* **1959**, 2003.
- [4] Schubert, E. M. *J. Chem. Educ.* **1992**, 69, 62.
- [5] Andersen, R. A.; Faegri, K.; Green, J. C.; Haaland, A.; Lappert, M. F.; Leung, W. P.; Rypdal, K. *Inorg. Chem.* **1988**, 27, 1782–1786.
- [6] Bottaro, J. C.; Penwell, P. E.; Schmitt, R. J. *Synth. Commun.* **1997**, 27, 1465–1467.
- [7] Sheldrick, G. M. *Acta Cryst. A* **2015**, 71, 3–8.
- [8] Sheldrick, G. M. *Acta. Crystallogr. C* **2015**, 71, 3–8.
- [9] Farrugia, L. J. *J. Appl. Crystallogr.* **1999**, 32, 837–838.
- [10] Betteridge, P. W.; Carruthers, J. R.; Cooper, R. I.; Prout, K.; Watkin, D. J. *J. Appl. Crystallogr.* **2003**, 36, 1487.
- [11] Fieß, H., Ed. *International tables for crystallography*, 1. online ed.; Springer: Berlin, 2006.
- [12] SADABS-2016/2. *Bruker*, 2016.
- [13] Neese, F. *WIREs Comput Mol Sci* **2022**, 12.
- [14] Neese, F. *WIREs Comput Mol Sci* **2018**, 8.
- [15] Neese, F. *WIREs Comput Mol Sci* **2012**, 2, 73–78.
- [16] Neese, F.; Wennmohs, F.; Becker, U.; Riplinger, C. *J. Chem. Phys.* **2020**, 152, 224108.
- [17] Perdew, J. P.; Ernzerhof, M.; Burke, K. *J. Chem. Phys.* **1996**, 105, 9982–9985.
- [18] Adamo, C.; Barone, V. *J. Chem. Phys.* **1999**, 110, 6158–6170.
- [19] Tao, J.; Perdew, J. P.; Staroverov, V. N.; Scuseria, G. E. *Phys. Rev. Lett.* **2003**, 91, 146401.
- [20] Staroverov, V. N.; Scuseria, G. E.; Tao, J.; Perdew, J. P. *J. Chem. Phys.* **2003**, 119, 12129–12137.
- [21] van Wüllen, C. *J. Chem. Phys.* **1998**, 109, 392–399.
- [22] Weigend, F.; Ahlrichs, R. *Phys. Chem. Chem. Phys.* **2005**, 7, 3297–3305.
- [23] Caldeweyher, E.; Ehlert, S.; Hansen, A.; Neugebauer, H.; Spicher, S.; Bannwarth, C.; Grimme, S. *J. Chem. Phys.* **2019**, 150, 154122.

- [24] Weigend, F. *Phys. Chem. Chem. Phys.* **2006**, *8*, 1057–1065.
- [25] Reith, S.; Demeshko, S.; Battistella, B.; Reckziegel, A.; Schneider, C.; Stoy, A.; Lichtenberg, C.; Meyer, F.; Munz, D.; Werncke, C. G. *Chem. Sci.* **2022**, *13*, 7907–7913.
- [26] Yang, P.-C.; Yu, K.-P.; Hsieh, C.-T.; Zou, J.; Fang, C.-T.; Liu, H.-K.; Pao, C.-W.; Deng, L.; Cheng, M.-J.; Lin, C.-Y. *Chem. Sci.* **2022**, *13*, 9637–9643.
- [27] Roos, B. O.; Taylor, P. R.; Sigbahn, P. E. *Chem. Phys.* **1980**, *48*, 157–173.
